# Supplementary material
Source: publisher figshare collection journal article supplement (https://acs.figshare.com/ndownloader/files/3739219)
Supplement: Supplementary file 1 [file 3739219]

**Fragment Parameters for the Calibration of Molecular Weights of Rod-Like Oligomers/Polymers by Gel Permeation Chromatography**

Chih-Chun Chen, Chih-Wei Chen, Kamani Satyanarayana, and Tien-Yau Luh\*

*Department of Chemistry, National Taiwan University, Taipei, Taiwan 106*

**Supporting Information**

1. Experimental details for the synthesis of **1a**, **1b**, and **1c**.
2.  $^1\text{H}$  and  $^{13}\text{C}$  NMR spectra for all new compounds shown in Scheme S1.
3. GPC profiles for **1a**, **1b**, and **1c**.
4. Plots of  $M_n$  and  $M_c$  against  $M_r$  values for **1-15**.

# Scheme S1 Synthetic scheme

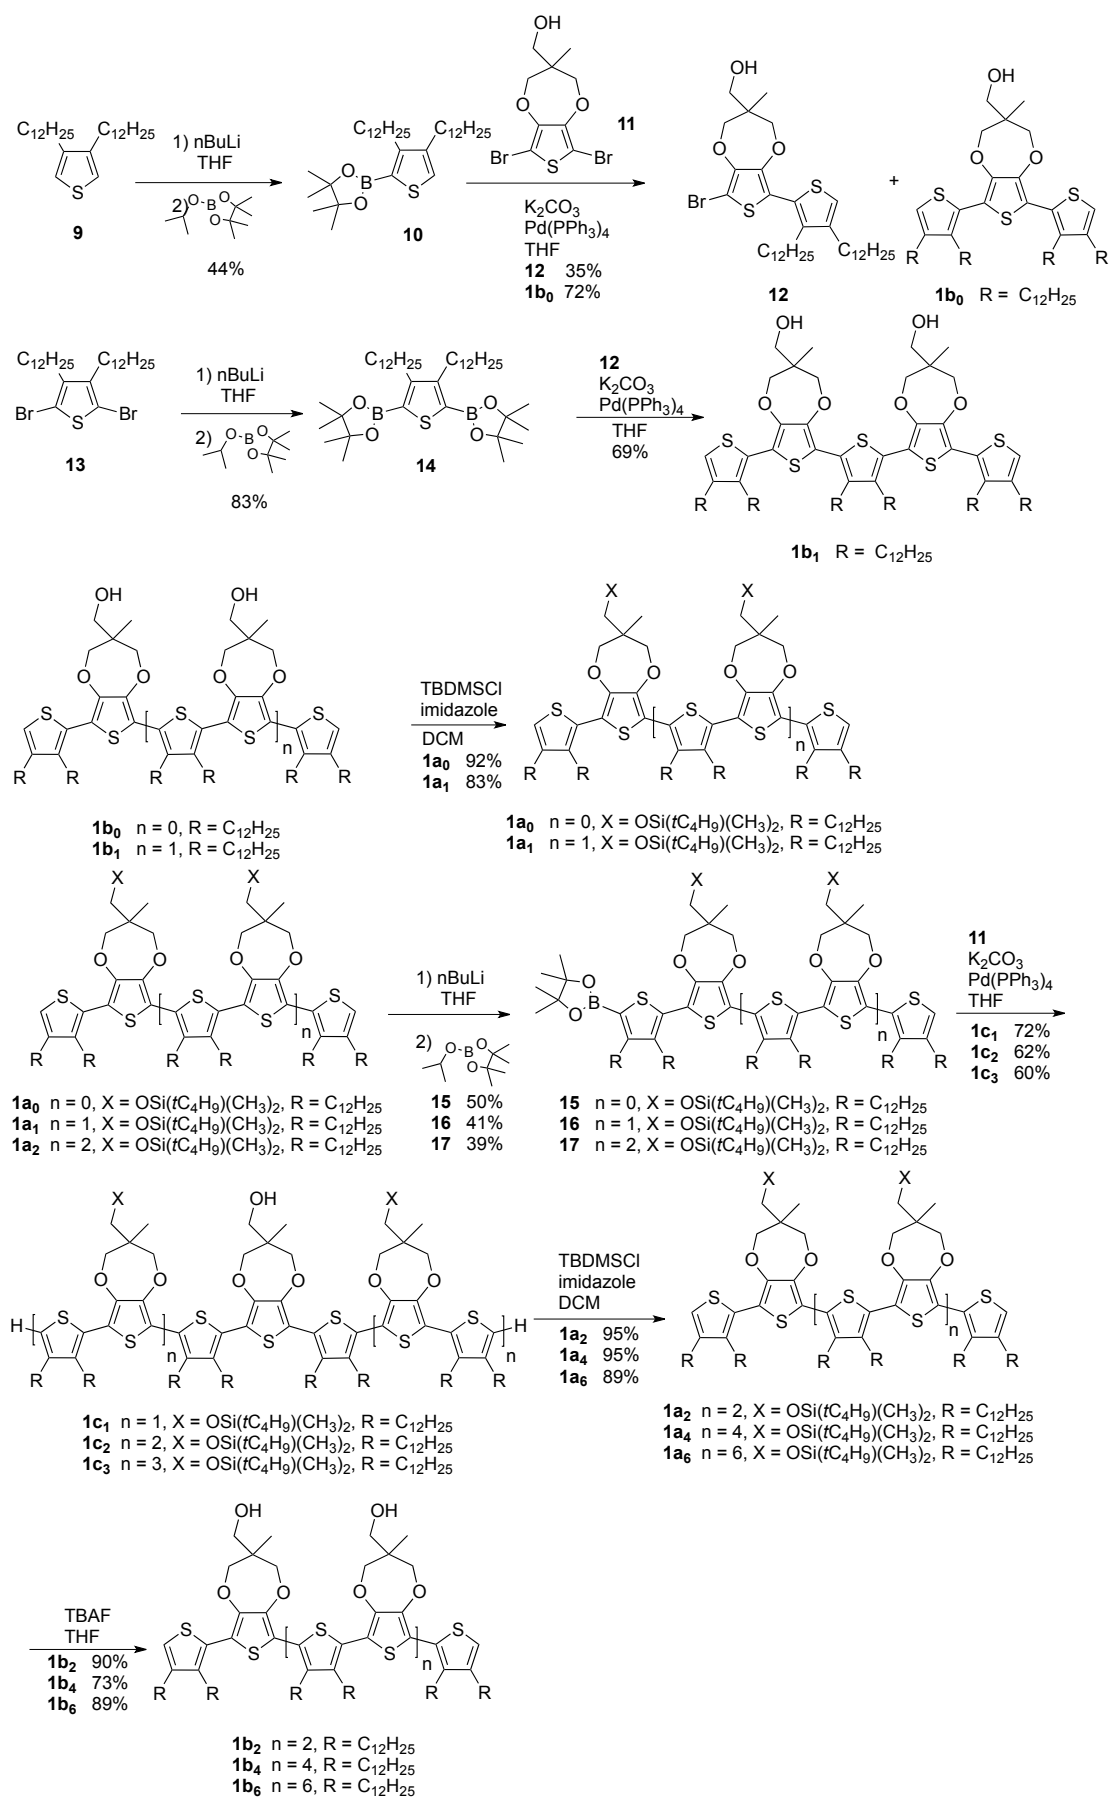

**General.** All melting points were recorded on a Fargo MP-ID equipment and were uncorrected.  $^1\text{H}$  and  $^{13}\text{C}$  nuclear magnetic resonance (NMR) spectra were recorded on a Varian 400 Unity plus (400 MHz) at ambient temperature. Chemical shifts ( $\delta$ ) and coupling constants ( $J$ ) were expressed in unit of ppm and Hz, respectively. Samples for  $^1\text{H}$  and  $^{13}\text{C}$  NMR measurements were dissolved in  $\text{CDCl}_3$ . Infrared Spectra were taken on a Bio-Rad FTS-40 infrared spectrophotometer using KBr palate for solid samples. MALDI-mass spectra were conducted on an Applied Biosystem 4800 Proteomics Analyzer equipped with an Nd/YAG laser (335 nm) operating at repetition rate of 200 Hz. EI and Fab-mass spectra were collected on a JMS-700 double focusing mass spectrometer. Electrospray ionization (ESI) mass spectra were measured on a Waters LCT premier/XE mass spectrometer analyzer.

**3,4-Didodecyl-2-(4,4,5,5-tetramethyl-1,3,2-dioxaborolanyl)thiophene (17)**

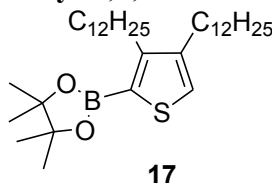

Under  $\text{N}_2$ , to a THF solution (180 mL) of **16**<sup>S1</sup> (11.1 g, 26.4 mmol) was added dropwise  $n\text{BuLi}$  (2.5 M in hexane, 12.7 mL, 31.7 mmol) at  $-78\text{ }^\circ\text{C}$ . After stirring at rt for 3 h, 2-isopropoxy-4,4,5,5-tetramethyl-1,3,2-dioxaborolane (4.9 g, 26.2 mmol) was added dropwise at  $-78\text{ }^\circ\text{C}$  and the mixture was stirred at rt overnight. Water (10 mL) was added, and the mixture was extracted with EA (30 mL). The organic layer was washed with saturated  $\text{NH}_4\text{Cl}$  (50 mL x 3), brine (50 mL), dried ( $\text{MgSO}_4$ ), filtered and the filtrate was concentrated in vacuo. The residue was chromatographed on silica gel (hexane) to afford **17** as a colorless oil (12 g, 83%):  $^1\text{H}$  NMR (400 MHz,  $\text{CDCl}_3$ )  $\delta$  0.88 (t,  $J = 6.8\text{ Hz}$ , 6 H), 1.26-1.36 (m, 48 H), 1.46 (quint,  $J = 7.7\text{ Hz}$ , 2 H), 1.60 (quint,  $J = 7.7\text{ Hz}$ , 2 H), 2.52 (t,  $J = 7.7\text{ Hz}$ , 2 H), 2.80 (t,  $J = 7.7\text{ Hz}$ , 2 H), 7.16 (s, 1 H);  $^{13}\text{C}$  NMR (100 MHz,  $\text{CDCl}_3$ )  $\delta$  14.1, 22.7, 24.8, 28.6, 29.37, 29.47, 29.54, 29.62, 29.68, 29.72, 30.1, 32.0, 83.4, 127.0, 143.9, 153.4; IR (KBr)  $\nu$  2976, 2924, 2853,

1541, 1457, 1378, 1371, 1339, 1305, 1145, 856, 758, 659  $\text{cm}^{-1}$ ; HRMS (ESI) ( $M + \text{Na}$ ) calcd for  $\text{C}_{34}\text{H}_{63}\text{BNaO}_2\text{S}$ : 569.4540; found: 569.4537.

### 3,4-Didodecyl-2,5-bis(4,4,5,5-tetramethyl-1,3,2-dioxaborolanyl)thiophene (**21**)

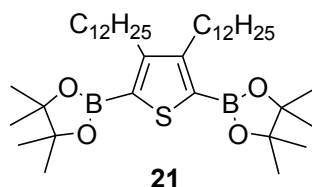

In a manner similar to that described for the synthesis of **17**, a mixture of **20**<sup>S1</sup> (3.4 g, 5.9 mmol),  $n\text{BuLi}$  (2.5 M in hexane, 9.4 mL, 23.5 mmol), and 2-isopropoxy-4,4,5,5-tetramethyl-1,3,2-dioxaborolane (3.3 g, 17.6 mmol) was transformed into **21** as a colorless oil (1.7 g, 44%):  $^1\text{H}$  NMR (400 MHz,  $\text{CDCl}_3$ )  $\delta$  0.89 (t,  $J = 6.8$  Hz, 6 H), 1.26-1.36 (m, 60 H), 1.46 (quint,  $J = 7.5$  Hz, 4 H), 2.78 (t,  $J = 7.5$  Hz, 4 H);  $^{13}\text{C}$  NMR (100 MHz,  $\text{CDCl}_3$ )  $\delta$  14.1, 22.7, 24.8, 28.5, 29.38, 29.48, 29.68, 29.73, 29.8, 31.9, 32.5, 83.4, 154.0; IR (KBr)  $\nu$  2924, 2853, 1527, 1467, 1371, 1341, 1305, 1270, 1167, 1136, 1104, 857, 684  $\text{cm}^{-1}$ ; HRMS (MALDI) ( $M + \text{Na}$ ) calcd for  $\text{C}_{40}\text{H}_{74}\text{B}_2\text{NaO}_4\text{S}$ : 695.5392; found: 695.5386.

### Hydroxymethyl-substituted 2-(3,4-didodecyl-2-thienyl)-5-bromo-3,4-dioxythiophene (**19**)

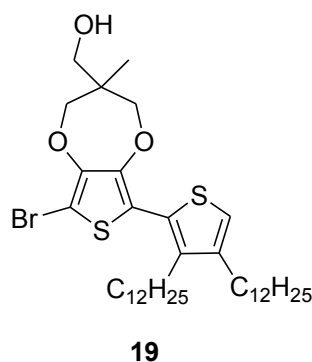

A mixture of **18**<sup>S2</sup> (6.4 g, 17.9 mmol), **17** (9.4 g, 17.2 mmol), aqueous  $\text{K}_2\text{CO}_3$  (2 M, 34 mL), and  $\text{Pd}(\text{PPh}_3)_4$  (990 mg, 0.86 mmol) in THF (170 mL) was degassed with freeze-pump-thaw method and the mixture was stirred at 70  $^\circ\text{C}$  for 2 days. Water (10 mL) was added, and the mixture was extracted with EA (30 mL). The organic layer was washed with saturated  $\text{NH}_4\text{Cl}$  (50 mL x 3), brine (50 mL), dried ( $\text{MgSO}_4$ ),



filtered and the filtrate was concentrated in vacuo. The residue was chromatographed on silica gel (EA/hexane = 8/92) to afford **1b<sub>0</sub>** (1.12 g, 9%) and **19** as a white solid (4.23 g, 35%): mp 59-60 °C; <sup>1</sup>H NMR (400 MHz, CDCl<sub>3</sub>) δ 0.88 (t, *J* = 6.8 Hz, 3 H), 0.89 (t, *J* = 6.8 Hz, 3 H), 0.98 (s, 3 H), 1.26-1.50 (m, 38 H), 1.55-1.60 (m, 1 H), 1.64 (quint, *J* = 7.7 Hz, 2 H), 2.50 (t, *J* = 7.7 Hz, 2 H), 2.57 (t, *J* = 8.0 Hz, 2 H), 3.71-3.77 (m, 2 H) 3.78 (d, *J* = 12.0 Hz, 1 H), 3.84 (d, *J* = 12.0 Hz, 1 H), 4.12 (d, *J* = 12.0 Hz, 1 H), 4.19 (d, *J* = 12.0 Hz, 1 H), 6.93 (s, 1 H); <sup>13</sup>C NMR (100 MHz, CDCl<sub>3</sub>) δ 14.1, 17.0, 22.7, 27.80, 29.2, 29.36, 29.54, 29.62, 29.66, 29.7, 29.8, 30.3, 31.2, 44.0, 65.5, 76.6, 109.0, 120.7, 126.2, 141.0, 142.7, 144.8, 145.3; IR (KBr) ν 3335, 2954, 2920, 2849, 1546, 1502, 1468, 1434, 1389, 1370, 1052, 1024, 873, 762, 734, 720 cm<sup>-1</sup>; HRMS (EI) (M) calcd for C<sub>37</sub>H<sub>61</sub>BrO<sub>3</sub>S<sub>2</sub>: 696.3245; found: 696.3256.

**Hydroxymethyl-substituted 2,5-[bis(3,4-didodecyl-2-thienyl)]-3,4-dioxothiophene (1b<sub>0</sub>)**

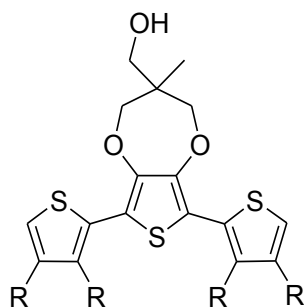

**1b<sub>0</sub>** R = C<sub>12</sub>H<sub>25</sub>

In a manner similar to that described for the synthesis of **19**, a mixture of **18**<sup>S2</sup> (1.8 g, 5.0 mmol), **17** (6.0 g, 10.9 mmol), aqueous K<sub>2</sub>CO<sub>3</sub> (2 M, 20 mL), and Pd(PPh<sub>3</sub>)<sub>4</sub> (287 mg, 0.25 mmol) was transformed into **1b<sub>0</sub>** as a pale yellow solid (3.7 g, 72%): mp 56-57 °C; <sup>1</sup>H NMR (400 MHz, CDCl<sub>3</sub>) δ 0.87 (t, *J* = 6.8 Hz, 6 H), 0.88 (t, *J* = 6.8 Hz, 6 H), 0.97 (s, 3 H), 1.24-1.44 (m, 72 H), 1.50 (quint, *J* = 7.8 Hz, 4 H), 1.59 (t, *J* = 5.8 Hz, 1 H), 1.65 (quint, *J* = 7.7 Hz, 4 H), 2.51 (t, *J* = 7.7 Hz, 4 H), 2.65 (t, *J* = 7.8 Hz, 4 H), 3.78 (d, *J* = 5.8.0 Hz, 2 H), 3.80 (d, *J* = 12.0 Hz, 2 H), 4.17 (d, *J* = 12.0 Hz, 2 H), 6.93 (s, 2 H); <sup>13</sup>C NMR (100 MHz, CDCl<sub>3</sub>) δ 14.4, 16.9, 22.7, 28.0, 29.2, 29.37, 29.46, 29.4, 29.55, 29.69, 29.73, 29.94, 30.4, 32.0, 43.9, 65.6, 76.5, 115.0, 120.3, 127.3, 140.1, 142.7, 145.7; IR (KBr) ν 3345, 2954, 2920, 2850, 1544, 1530, 1494, 1468,

1427, 1392, 1366, 1210, 1081, 1043, 964, 878, 721  $\text{cm}^{-1}$ ; HRMS (MALDI) (M) calcd for  $\text{C}_{65}\text{H}_{112}\text{O}_3\text{S}_3$ : 1036.7768; found: 1036.7774; GPC (THF):  $M_n = 1733$ , PDI = 1.01.

**TBS-protected hydroxymethyl-substituted 2,5-[bis(3,4-didodecyl-2-thienyl)]-3,4-dioxythiophene (**1a<sub>0</sub>**)**

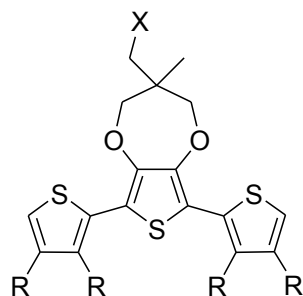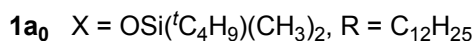

Under  $\text{N}_2$ , a DCM solution (10 mL) of **1b<sub>0</sub>** (1.0 g, 1.0 mmol), imidazole (203 mg, 3.0 mmol), and tert-butyldimethylsilyl chloride (195 mg, 1.3 mmol) was stirred at rt overnight. Water (10 mL) was added, and the mixture was extracted with DCM (20 mL). The organic layer was washed with saturated  $\text{NH}_4\text{Cl}$  (20 mL x 3), brine (20 mL), dried ( $\text{MgSO}_4$ ), filtered and the filtrate was concentrated in vacuo. The residue was chromatographed on silica gel (DCM/hexane = 10/90) to afford **1a<sub>0</sub>** as a yellow oil (1.05 g, 92%):  $^1\text{H}$  NMR (400 MHz,  $\text{CDCl}_3$ )  $\delta$  0.06 (s, 6 H), 0.88 (t,  $J = 6.8$  Hz, 6 H), 0.89 (t,  $J = 6.8$  Hz, 6 H), 0.90 (s, 9 H), 0.99 (s, 3 H), 1.24-1.44 (m, 72 H), 1.51 (quint,  $J = 7.7$  Hz, 4 H), 1.65 (quint,  $J = 7.6$  Hz, 4 H), 2.52 (t,  $J = 7.6$  Hz, 4 H), 2.67 (t,  $J = 7.7$  Hz, 4 H), 3.67 (s, 2 H), 3.81 (d,  $J = 12.0$  Hz, 2 H), 4.06 (d,  $J = 12.0$  Hz, 2 H), 6.93 (s, 2 H);  $^{13}\text{C}$  NMR (100 MHz,  $\text{CDCl}_3$ )  $\delta$  -5.5, 14.1, 17.1, 18.3, 22.7, 25.9, 28.0, 29.2, 29.20, 29.39, 29.47, 29.57, 29.67, 29.70, 29.74, 30.0, 30.3, 32.0, 44.2, 65.8, 76.5, 114.6, 120.2, 127.6, 140.0, 142.6, 145.9; IR (KBr)  $\nu$  2957, 2925, 2853, 1496, 1464, 1426, 1391, 1373, 1256, 1102, 1075, 1006, 837, 775, 721  $\text{cm}^{-1}$ ; HRMS (MALDI) (M) calcd for  $\text{C}_{71}\text{H}_{126}\text{O}_3\text{S}_3\text{Si}$ : 1150.8638; found: 1150.8654; GPC (THF):  $M_n = 1816$ , PDI = 1.01.

**4,4,5,5-Tetramethyl-1,3,2-dioxaborolanyl-substituted **1a<sub>0</sub>** (**22**)**

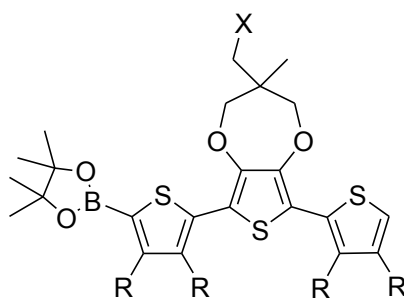

**22** X = OSi(*t*C<sub>4</sub>H<sub>9</sub>)(CH<sub>3</sub>)<sub>2</sub>, R = C<sub>12</sub>H<sub>25</sub>

In a manner similar to that described for the synthesis of **17**, a mixture of **1a<sub>0</sub>** (6.4 g, 5.6 mmol), <sup>*n*</sup>BuLi (2.5 M in hexane, 2.6 mL, 6.5 mmol), and 2-isopropoxy-4,4,5,5-tetramethyl-1,3,2-dioxaborolane (1.0 g, 5.4 mmol) was transformed into **22** as a yellow oil (3.7 g, 50%): <sup>1</sup>H NMR (400 MHz, CDCl<sub>3</sub>) δ 0.11 (s, 6 H), 0.93 (t, *J* = 6.8 Hz, 6 H), 0.94 (t, *J* = 6.8 Hz, 6 H), 0.95 (s, 9 H), 1.04 (s, 3 H), 1.25-1.49 (m, 84 H), 1.52-1.63 (m, 6 H), 1.70 (quint, *J* = 7.6 Hz, 2 H), 2.57 (t, *J* = 7.6 Hz, 2 H), 2.73 (t, *J* = 8.8 Hz, 2 H), 2.75 (t, *J* = 8.8 Hz, 2 H), 2.85 (t, *J* = 7.8 Hz, 2 H), 3.69 (d, *J* = 10.0 Hz, 1 H), 3.75 (d, *J* = 10.0 Hz, 1 H), 3.86 (d, *J* = 12.0 Hz, 1 H), 3.89 (d, *J* = 12.0 Hz, 1 H), 4.06 (d, *J* = 12.0 Hz, 1 H), 4.07 (d, *J* = 12.0 Hz, 1 H) 6.67 (s, 1 H); <sup>13</sup>C NMR (100 MHz, CDCl<sub>3</sub>) δ -5.6, 14.1, 17.1, 22.7, 24.8, 25.9, 28.0, 29.2, 29.4, 29.48, 29.57, 29.71, 29.74, 30.0, 30.3, 30.7, 31.9, 32.5, 44.2, 65.9, 76.4, 83.4, 114.5, 114.9, 120.2, 127.7, 140.0, 141.4, 142.6, 145.9, 154.0; IR (KBr) ν 2955, 2922, 2853, 1495, 1465, 1390, 1371, 1339, 1305, 1271, 1257, 1144, 1077, 776, 721, 670 cm<sup>-1</sup>; HRMS (FAB) (M) calcd for C<sub>77</sub>H<sub>137</sub>BO<sub>5</sub>S<sub>3</sub>Si: 1276.9491; found: 1276.9510.

**Alternating tris-(3,4-didodecylthiophene)-bis-(hydroxymethyl-substituted-3,4-dioxythiophene) pentamer (1b<sub>1</sub>)**

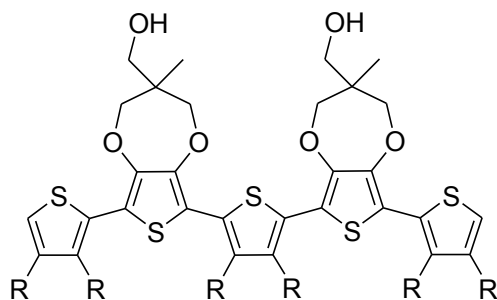

**1b<sub>1</sub>** R = C<sub>12</sub>H<sub>25</sub>

In a manner similar to that described for the synthesis of **19**, a mixture of **19** (3.2 g, 4.6 mmol), **21** (1.4 g, 2.1 mmol), aqueous K<sub>2</sub>CO<sub>3</sub> (2 M, 4.8 mL), and Pd(PPh<sub>3</sub>)<sub>4</sub> (120 mg, 0.1 mmol) was transformed into **1b<sub>1</sub>** as a yellow solid (2.34 g, 69%): mp 96-98 °C; <sup>1</sup>H NMR (400 MHz, CDCl<sub>3</sub>) δ 0.86 (t, *J* = 6.8 Hz, 6 H), 0.87 (t, *J* = 6.8 Hz, 6 H), 0.88 (t, *J* = 6.8 Hz, 6 H), 0.97 (s, 3 H), 0.98 (s, 3 H), 1.20-1.45 (m, 108 H), 1.47-1.58 (m, 8 H), 1.59-1.70 (m, 6 H), 2.52 (t, *J* = 7.8 Hz, 4 H), 2.62-2.71 (m, 8 H), 3.79 (d, *J* = 6.0 Hz, 4 H), 3.81 (d, *J* = 12.4 Hz, 2 H), 3.82 (d, *J* = 12.0 Hz, 2 H), 4.18 (d, *J* = 12.0 Hz, 2 H), 4.19 (d, *J* = 12.4 Hz, 2 H), 6.95 (s, 2 H); <sup>13</sup>C NMR (100 MHz, CDCl<sub>3</sub>) δ 14.1, 16.9, 22.7, 28.2, 28.4, 28.5, 28.6, 29.2, 29.38, 29.45, 29.51, 29.57, 29.66, 29.70, 29.74, 30.0, 30.1, 30.4, 30.7, 31.9, 43.9, 65.7, 76.5, 114.5, 115.2, 120.3, 127.3, 127.7, 140.1, 140.6, 142.7, 145.7, 145.8; IR (KBr) ν 3421, 2955, 2920, 2850, 1496, 1467, 1457, 1429, 1364, 1051, 897, 721 cm<sup>-1</sup>; MS (MALDI) (*M*) calcd for C<sub>102</sub>H<sub>172</sub>O<sub>6</sub>S<sub>5</sub>: 1653.1757; found: 1653.1692; GPC (THF): *M<sub>n</sub>* = 2668, PDI = 1.01.

#### TBS-protected **1b<sub>1</sub>** (**1a<sub>1</sub>**)

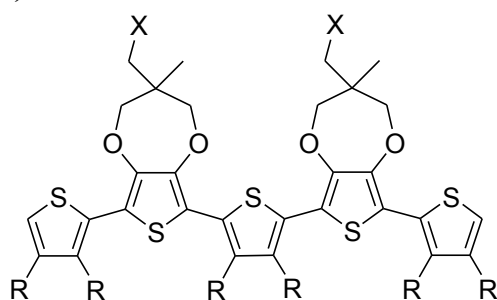

**1a<sub>1</sub>** X = OSi(*t*C<sub>4</sub>H<sub>9</sub>)(CH<sub>3</sub>)<sub>2</sub>, R = C<sub>12</sub>H<sub>25</sub>

In a manner similar to that described for the synthesis of **1a<sub>0</sub>**, a mixture of **1b<sub>1</sub>** (309 mg, 0.2 mmol), imidazole (76 mg, 1.1 mmol), and tert-butyldimethylsilyl chloride (73 mg, 0.5 mmol) was transformed into **1a<sub>1</sub>** as a yellow solid (282 mg, 83%): mp 37-39 °C; <sup>1</sup>H NMR (400 MHz, CDCl<sub>3</sub>) δ 0.10 (s, 12 H), 0.90 (t, *J* = 6.8 Hz, 6 H), 0.91 (t, *J* = 6.8 Hz, 6 H), 0.92 (t, *J* = 6.8 Hz, 6 H), 0.94 (s, 18 H), 1.03 (s, 6 H), 1.20-1.49 (m, 108 H), 1.52-1.63 (m, 8 H), 1.69 (quint, *J* = 7.6 Hz, 4 H), 2.56 (t, *J* = 7.6 Hz, 4 H), 2.67-2.79 (m, 8 H), 3.72 (s, 4 H), 3.85 (d, *J* = 12.0 Hz, 2 H), 3.86 (d, *J* = 12.0 Hz, 2 H), 4.10 (d, *J* = 12.0 Hz, 2 H), 4.12 (d, *J* = 12.0 Hz, 2 H), 6.96 (s, 2 H); <sup>13</sup>C NMR (100 MHz, CDCl<sub>3</sub>) δ -5.55, -5.52, 14.1, 17.1, 18.3, 22.7, 25.9, 28.0, 28.3, 29.2, 29.39,

29.46, 29.51, 29.58, 29.65, 29.68, 29.72, 29.76, 30.0, 30.1, 30.3, 30.6, 31.9, 44.2, 65.9, 76.6, 114.3, 114.8, 120.2, 127.7, 127.8, 139.9, 140.4, 142.6, 145.8, 145.9; IR (KBr)  $\nu$  2957, 2922, 2851, 1494, 1469, 1427, 1374, 1363, 1258, 1104, 1077, 1030, 837, 774, 720  $\text{cm}^{-1}$ ; HRMS (MALDI) (M) calcd for  $\text{C}_{114}\text{H}_{200}\text{O}_6\text{S}_5\text{Si}_2$ : 1881.3487; found: 1881.3459; GPC (THF):  $M_n = 2755$ , PDI = 1.01.

**4,4,5,5-Tetramethyl-1,3,2-dioxaborolanyl-substituted  $1\mathbf{a}_1$  ( $2\mathbf{3}$ )**

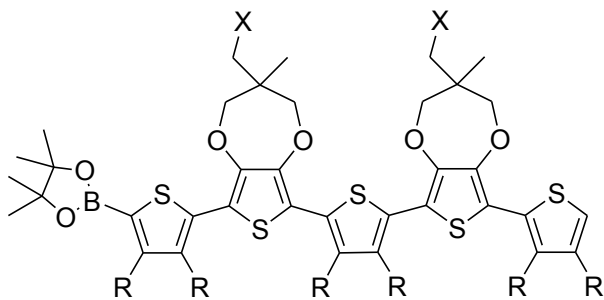

**23** X =  $\text{OSi}(\text{C}_4\text{H}_9)(\text{CH}_3)_2$ , R =  $\text{C}_{12}\text{H}_{25}$

In a manner similar to that described for the synthesis of **17**, a mixture of **1a<sub>1</sub>** (2.28 g, 1.2 mmol),  $n\text{BuLi}$  (2.5 M in hexane, 0.58 mL, 1.5 mmol), and 2-isopropoxy-4,4,5,5-tetramethyl-1,3,2-dioxaborolane (225 mg, 1.2 mmol) was transformed into **23** as a yellow oil (1 g, 41%):  $^1\text{H}$  NMR (400 MHz,  $\text{CDCl}_3$ )  $\delta$  0.09 (s, 12 H), 0.87-0.95 (m, 36 H), 1.02 (s, 6 H), 1.22-1.48 (m, 120 H), 1.50-1.61 (m, 10 H), 1.68 (quint,  $J = 7.6$  Hz, 2 H), 2.55 (t,  $J = 7.6$  Hz, 2 H), 2.66-2.76 (m, 8 H), 2.82 (t,  $J = 7.8$  Hz, 2 H), 3.63-3.78 (m, 4 H), 3.79-3.92 (m, 4 H), 4.04-4.16 (m, 4 H), 6.95 (s, 1 H);  $^{13}\text{C}$  NMR (100 MHz,  $\text{CDCl}_3$ )  $\delta$  -5.56, -5.53, 14.1, 17.1, 18.3, 22.7, 24.8, 25.9, 28.0, 28.3, 29.2, 29.39, 29.48, 29.57, 29.70, 29.76, 29.95, 30.0, 30.1, 30.3, 30.6, 30.7, 31.9, 44.2, 66.0, 76.5, 83.4, 114.33, 114.34, 114.64, 114.65, 114.69, 114.74, 120.2, 127.7, 127.8, 127.9, 134.3, 139.9, 140.4, 140.5, 141.4, 142.6, 145.9, 154.1; IR (KBr)  $\nu$  2953, 2924, 2853, 1467, 1427, 1390, 1371, 1338, 1257, 1144, 1076, 838, 776, 671  $\text{cm}^{-1}$ ; HRMS (MALDI) (M + H) calcd for  $\text{C}_{120}\text{H}_{212}\text{BO}_8\text{S}_5\text{Si}_2$ : 2008.4417; found: 2008.4391.

**Bis-TBS-protected alternating tetrakis-(3,4-didodecylthiophene)-tris-(hydroxymethyl-substituted-3,4-dioxythiophene) heptamer ( $1\mathbf{c}_1$ )**

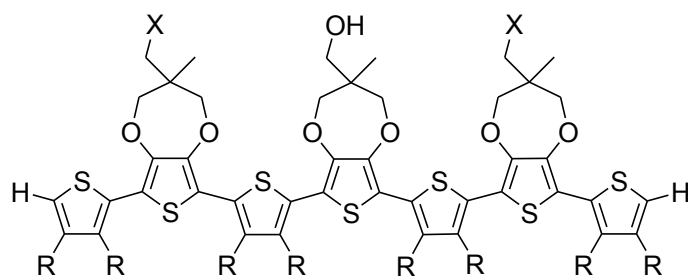

**1c<sub>1</sub>** X = OSi(<sup>t</sup>C<sub>4</sub>H<sub>9</sub>)(CH<sub>3</sub>)<sub>2</sub>, R = C<sub>12</sub>H<sub>25</sub>

In a manner similar to that described for the synthesis of **19**, a mixture of **18**<sup>S2</sup> (0.4 g, 1.17 mmol), **22** (4.5 g, 3.52 mmol), aqueous K<sub>2</sub>CO<sub>3</sub> (2 M, 4.5 mL), and Pd(PPh<sub>3</sub>)<sub>4</sub> (70 mg, 0.06 mmol) was transformed into **1c<sub>1</sub>** as a red solid (2.1 g, 72%): mp 67-68 °C; <sup>1</sup>H NMR (400 MHz, CDCl<sub>3</sub>) δ 0.11 (s, 12 H), 0.89-0.96 (m, 24 H), 0.95 (s, 18 H) 1.02 (s, 3 H), 1.04 (s, 6 H) 1.25-1.49 (m, 144 H), 1.52-1.65 (m, 12 H), 1.70 (quint, *J* = 7.7 Hz, 4 H), 1.76 (t, *J* = 6.8 Hz, 1 H) 2.57 (t, *J* = 7.7 Hz, 4 H), 2.68-2.80 (m, 12 H), 3.73 (s, 4 H), 3.84-3.89 (m, 8 H), 4.12 (d, *J* = 12.0 Hz, 2 H), 4.14 (d, *J* = 12.0 Hz, 2 H), 4.24 (d, *J* = 12.0 Hz, 2 H), 6.97 (s, 2 H); <sup>13</sup>C NMR (100 MHz, CDCl<sub>3</sub>) δ -5.57, -5.54, 14.1, 19.2, 17.0, 18.2, 22.7, 25.9, 28.0, 28.3, 29.2, 29.39, 29.44, 29.50, 29.56, 29.64, 29.70, 29.75, 29.99, 30.1, 30.3, 30.6, 30.7, 31.9, 43.9, 44.2, 65.6, 65.9, 76.5, 114.2, 114.7, 114.8, 114.9, 120.2, 127.6, 127.7, 128.0, 140.0, 140.4, 140.5, 142.6, 145.7, 145.8, 145.9; IR (KBr) ν 3440, 2954, 2919, 2850, 1494, 1469, 1426, 1375, 1256, 1075, 838, 775 cm<sup>-1</sup>; HRMS (MALDI) (M) calcd for C<sub>151</sub>H<sub>260</sub>O<sub>9</sub>S<sub>7</sub>Si<sub>2</sub>: 2497.7471; found: 2497.7513; GPC (THF): *M<sub>n</sub>* = 3710, PDI = 1.01.

#### TBS-protected **1b<sub>2</sub>** (**1a<sub>2</sub>**)

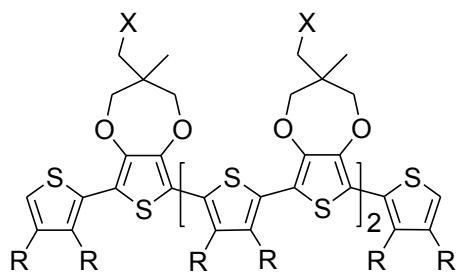

**1a<sub>2</sub>** X = OSi(<sup>t</sup>C<sub>4</sub>H<sub>9</sub>)(CH<sub>3</sub>)<sub>2</sub>, R = C<sub>12</sub>H<sub>25</sub>

In a manner similar to that described for the synthesis of **1a<sub>0</sub>**, a mixture of **1c<sub>1</sub>** (2.1 g, 0.8 mmol), imidazole (170 mg, 2.5 mmol), and tert-butyldimethylsilyl chloride (190

mg, 1.3 mmol) was transformed into **1a<sub>2</sub>** as a red solid (2.1 g, 95%): mp 48-50 °C; <sup>1</sup>H NMR (400 MHz, CDCl<sub>3</sub>) δ 0.05-0.13 (ms, 18 H), 0.93-0.92 (m, 51 H), 1.00-1.05 (ms, 9 H), 1.20-1.45 (m, 144 H), 1.49-1.60 (m, 12 H), 1.66 (quint, *J* = 7.5 Hz, 4 H), 2.52 (t, *J* = 7.5 Hz, 4 H), 2.62-2.76 (m, 12 H), 3.66-3.70 (m, 6 H), 3.78-3.87 (m, 6 H), 4.04-4.12 (m, 6 H). 6.93 (s, 2 H); <sup>13</sup>C NMR (100 MHz, CDCl<sub>3</sub>) δ -5.55, -5.52, 14.1, 17.1, 18.3, 22.7, 25.9, 28.0, 28.4, 29.2, 29.40, 29.47, 29.51, 29.57, 29.67, 29.71, 29.77, 30.0, 30.1, 30.2, 30.3, 30.6, 31.9, 44.2, 65.9, 76.5, 114.3, 114.5, 114.8, 120.2, 127.7, 127.8, 139.9, 140.41, 140.44, 142.6, 145.88, 145.91; IR (KBr) ν 2955, 2924, 2853, 1467, 1373, 1256, 1103, 1074, 838, 776 cm<sup>-1</sup>; HRMS (MALDI) (*M* + *H*) calcd for C<sub>157</sub>H<sub>275</sub>O<sub>9</sub>S<sub>7</sub>Si<sub>3</sub>: 2612.8414; found: 2612.8359; GPC (THF): *M<sub>n</sub>* = 3589, PDI = 1.01.

**Alternating tetrakis-(3,4-didodecylthiophene)-tris-(hydroxy-methyl-substituted-3,4-dioxythiophene) heptamer (1b<sub>2</sub>)**

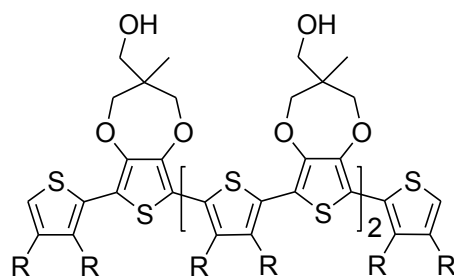

**1b<sub>2</sub>** R = C<sub>12</sub>H<sub>25</sub>

Under N<sub>2</sub>, a THF solution (5 mL) of **1a<sub>2</sub>** (170 mg, 0.07 mmol), and tetra-*n*-butylammonium fluoride (1 M in THF, 0.39 mL, 0.39 mmol) was stirred at rt for 3 h. Water (5 mL) was added, and the mixture was extracted with DCM (10 mL). The organic layer was washed with saturated NH<sub>4</sub>Cl (10 mL x 3), brine (10 mL), dried (MgSO<sub>4</sub>), filtered and the filtrate was concentrated in vacuo. The residue was recrystallized with ethanol/chloroform to afford **1b<sub>2</sub>** as a red solid (154 mg, 90%): mp 117-118 °C; <sup>1</sup>H NMR (400 MHz, CDCl<sub>3</sub>) δ 0.82-0.92 (m, 24 H), 0.94-1.03 (ms, 9 H), 1.12-1.46 (m, 144 H), 1.48-1.61 (m, 12 H), 1.66 (quint, *J* = 7.7 Hz, 4 H), 1.76-1.92 (ms, 3 H), 2.53 (t, *J* = 7.7 Hz, 4 H), 2.62-2.80 (m, 12 H), 3.75-3.89 (m, 12 H), 4.16-4.26 (m, 6 H), 6.95 (s, 2 H); <sup>13</sup>C NMR (100 MHz, CDCl<sub>3</sub>) δ 14.1, 16.9, 22.7, 28.0, 28.3, 29.2, 29.38, 29.45, 29.45, 29.56, 29.70, 29.75, 29.98, 30.0, 30.1, 30.4, 30.7,

31.9, 43.9, 65.6, 76.5, 114.5, 114.7, 115.2, 120.3, 127.3, 127.7, 127.7, 140.1, 140.58, 140.59, 142.7, 145.66, 145.72, 145.8; IR (KBr)  $\nu$  3428, 2957, 2919, 2850, 1493, 1469, 1421, 1364, 1050, 949, 875, 720  $\text{cm}^{-1}$ ; HRMS (MALDI) (M) calcd for  $\text{C}_{139}\text{H}_{232}\text{O}_9\text{S}_7$ : 2269.5714; found: 2269.5724; GPC (THF):  $M_n = 3461$ , PDI = 1.01.

**4,4,5,5-Tetramethyl-1,3,2-dioxaborolanyl-substituted  $\mathbf{1a_2}$  ( $\mathbf{24}$ )**

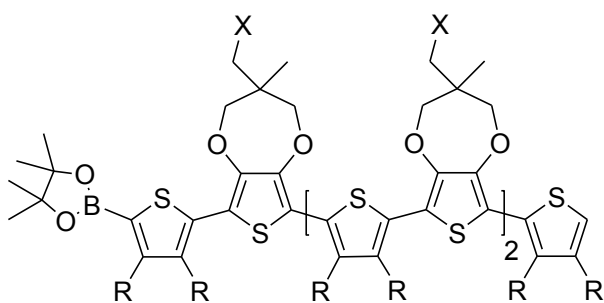

**24** X =  $\text{OSi}(t\text{C}_4\text{H}_9)(\text{CH}_3)_2$ , R =  $\text{C}_{12}\text{H}_{25}$

In a manner similar to that described for the synthesis of **17**, a mixture of **1a<sub>2</sub>** (2.1 g, 0.8 mmol),  $n\text{BuLi}$  (2.5 M in hexane, 0.39 mL, 0.98 mmol), and 2-isopropoxy-4,4,5,5-tetramethyl-1,3,2-dioxaborolane (150 mg, 0.8 mmol) was transformed into **24** as an orange oil (0.86 g, 39%):  $^1\text{H}$  NMR (400 MHz,  $\text{CDCl}_3$ )  $\delta$  0.03-0.13 (ms, 18 H), 0.87-0.94 (m, 51 H), 0.98-1.05 (ms, 9 H), 1.20-1.48 (m, 156 H), 1.49-1.63 (m, 14 H), 1.68 (quint,  $J = 7.7$  Hz, 2 H), 2.54 (t,  $J = 7.7$  Hz, 2 H), 2.62-2.77 (m, 12 H), 2.78-2.86 (m, 2 H), 3.63-3.75 (m, 6 H), 3.80-3.92 (m, 6 H), 4.05-4.18 (m, 6 H), 6.95 (s, 2 H);  $^{13}\text{C}$  NMR (100 MHz,  $\text{CDCl}_3$ )  $\delta$  -5.55, -5.52, 14.1, 17.1, 18.3, 22.7, 24.8, 25.9, 28.0, 28.3, 29.2, 29.39, 29.48, 29.57, 29.65, 29.67, 29.71, 29.76, 29.95, 30.0, 30.1, 30.2, 30.3, 30.6, 31.9, 44.2, 65.9, 76.6, 114.3, 114.5, 114.66, 114.71, 114.8, 120.2, 127.7, 127.8, 139.9, 140.40, 140.44, 142.6, 145.9, 154.1; IR (KBr)  $\nu$  2953, 2924, 2853, 1466, 1426, 1390, 1372, 1339, 1256, 1101, 1074, 837, 775, 671  $\text{cm}^{-1}$ ; HRMS (MALDI) (M) calcd for  $\text{C}_{163}\text{H}_{285}\text{BO}_{11}\text{S}_7\text{Si}_3$ : 2737.9188; found: 2737.9226.

**Tetrakis-TBS-protected alternating hexakis-(3,4-didodecylthiophene)-pentakis-(hydroxy-methyl-substituted-3,4-dioxythiophene) undecamer (**1c<sub>2</sub>**)**



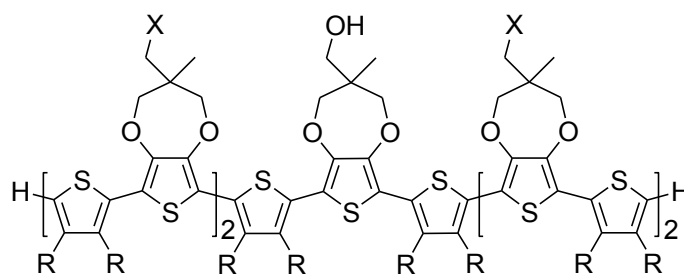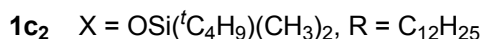

In a manner similar to that described for the synthesis of **19**, a mixture of **18**<sup>S2</sup> (53 mg, 0.15 mmol), **23** (900 mg, 0.45 mmol), aqueous K<sub>2</sub>CO<sub>3</sub> (2 M, 0.6 mL), and Pd(PPh<sub>3</sub>)<sub>4</sub> (10 mg, 0.01 mmol) was transformed into **1c<sub>2</sub>** as a red solid (363 mg, 62%): mp 65-66 °C; <sup>1</sup>H NMR (400 MHz, CDCl<sub>3</sub>) δ 0.10 (s, 12 H), 0.11 (s, 12 H), 0.86-0.96 (m, 72 H), 0.98-1.07 (ms, 15H), 1.21-1.50 (m, 216 H), 1.50-1.75 (m, 25 H), 2.51-2.60 (t, *J* = 7.6 Hz, 4 H), 2.65-2.85 (m, 20 H), 3.67-3.78 (m, 8 H), 3.80-3.94 (m, 12 H), 4.07-4.18 (m, 8 H), 4.24 (d, *J* = 12.0 Hz, 2 H), 6.96 (s, 2 H); <sup>13</sup>C NMR (100 MHz, CDCl<sub>3</sub>) δ -5.56, -5.53, 14.1, 16.9, 17.1, 18.3, 22.7, 25.9, 28.0, 28.4, 29.2, 29.3, 29.39, 29.46, 29.50, 29.56, 29.64, 29.67, 29.71, 29.76, 30.0, 30.1, 30.3, 30.6, 31.9, 44.2, 65.9, 76.6, 114.3, 114.37, 114.41, 114.6, 114.79, 114.83, 120.18, 120.19, 127.7, 127.8, 139.93, 139.96, 140.4, 140.6, 142.66, 145.7, 145.8, 145.87, 145.95; IR (KBr) ν 3428, 2957, 2919, 2849, 1492, 1469, 1421, 1392, 1374, 1256, 1068, 837, 815, 774, 720 cm<sup>-1</sup>; HRMS (MALDI) (*M* + *H*) calcd for C<sub>237</sub>H<sub>409</sub>O<sub>15</sub>S<sub>11</sub>Si<sub>4</sub>: 3959.7246; found: 3959.7152 ; GPC (THF): *M<sub>n</sub>* = 5231, PDI = 1.01

#### TBS-protected **1b<sub>4</sub>** (**1a<sub>4</sub>**)

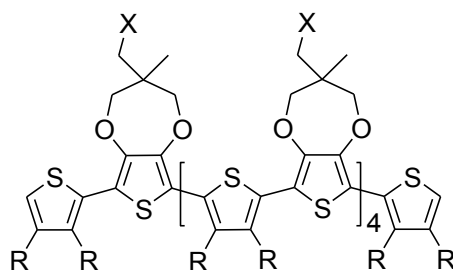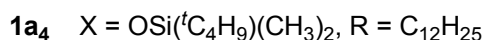

In a manner similar to that described for the synthesis of **1a<sub>0</sub>**, a mixture of **1c<sub>2</sub>** (250 mg, 0.06 mmol), imidazole (13 mg, 0.19 mmol), and tert-butyldimethylsilyl chloride

(14 mg, 0.09 mmol) was transformed into **1a<sub>4</sub>** as a red solid (244 mg, 95%): mp 59-60 °C; <sup>1</sup>H NMR (400 MHz, CDCl<sub>3</sub>) δ 0.03-0.12 (ms, 30 H), 0.84-0.97 (m, 81 H), 0.97-1.06 (ms, 15 H), 1.17-1.48 (m, 216 H), 1.48-1.63 (m, 20 H), 1.67 (quint, *J* = 7.5 Hz, 4 H), 2.54 (t, *J* = 7.5 Hz, 4 H), 2.60-2.84 (m, 20 H), 3.64-3.75 (m, 10 H), 3.77-3.92 (m, 10 H), 4.03-4.18 (m, 10 H), 6.94 (s, 2 H); <sup>13</sup>C NMR (100 MHz, CDCl<sub>3</sub>) δ -5.54, -5.51, 14.1, 17.1, 18.3, 22.7, 25.9, 27.2, 28.0, 28.4, 29.2, 29.4, 29.47, 29.51, 29.57, 29.65, 29.67, 29.78, 30.1, 30.3, 30.7, 32.0, 44.2, 65.9, 76.6, 114.3, 114.5, 114.8, 120.2, 127.7, 127.9, 140.4, 142.6, 145.9; IR (KBr) ν 2954, 2920, 2851, 1492, 1468, 1422, 1391, 1374, 1258, 1102, 1067, 838, 775, 720 cm<sup>-1</sup>; HRMS (MALDI) (*M* + *H*) calcd for C<sub>243</sub>H<sub>423</sub>O<sub>15</sub>S<sub>11</sub>Si<sub>5</sub>: 4073.8111; found: 4073.8056; GPC (THF): *M<sub>n</sub>* = 5460, PDI = 1.01.

**Alternating hexakis-(3,4-didodecylthiophene)-pentakis- (hydroxymethyl-substituted-3,4-dioxythiophene) undecamer (1b<sub>4</sub>)**

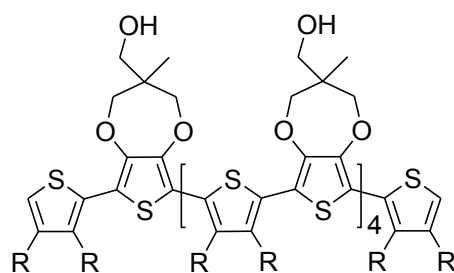

**1b<sub>4</sub>** R = C<sub>12</sub>H<sub>25</sub>

In a manner similar to that described for the synthesis of **1b<sub>2</sub>**, a mixture of **1a<sub>4</sub>** (240 mg, 0.06 mmol), and tetra-*n*-butylammonium fluoride (1 M in THF, 0.59 mL, 0.59 mmol) was transformed into **1b<sub>4</sub>** as a red solid (152 mg, 73%): mp 147-148 °C; <sup>1</sup>H NMR (400 MHz, CDCl<sub>3</sub>) δ 0.81-0.93 (m, 36 H), 0.95-1.04 (ms, 15 H), 1.17-1.47 (m, 216 H), 1.48-1.61 (m, 20 H), 1.66 (quint, *J* = 7.6 Hz, 4 H), 1.76-1.95 (ms, 5H), 2.53 (t, *J* = 7.6 Hz, 4 H), 2.58-2.82 (m, 20 H), 3.75-3.90 (m, 20 H), 4.13-4.27 (m, 10 H), 6.95 (s, 2 H); <sup>13</sup>C NMR (100 MHz, CDCl<sub>3</sub>) δ 14.1, 16.9, 22.7, 28.0, 28.4, 29.2, 29.38, 29.45, 29.49, 29.55, 29.69, 29.75, 30.0, 30.1, 30.4, 30.7, 31.9, 43.9, 65.7, 76.5, 114.5, 114.7, 115.2, 120.3, 127.3, 127.7, 140.1, 140.6, 142.7, 145.7; IR (KBr) ν 3421, 2955, 2920, 2850, 1494, 1468, 1420, 1364, 1263, 1049, 955, 720 cm<sup>-1</sup>; HRMS (MALDI) (*M*)

calcd for C<sub>213</sub>H<sub>352</sub>O<sub>15</sub>S<sub>11</sub>: 3502.3709; found: 3502.3747; GPC (THF):  $M_n$  = 4931, PDI = 1.01.

**Hexakis-TBS-protected alternating octakis-(3,4-didodecylthiophene)-heptakis-(hydroxy-methyl-substituted-3,4-dioxythiophene) pentadecamer (1c<sub>3</sub>)**

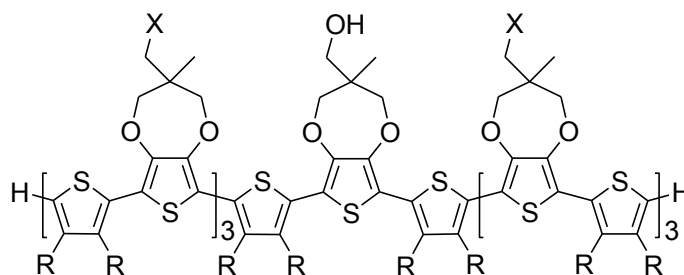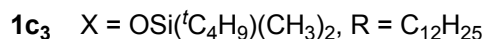

In a manner similar to that described for the synthesis of **19**, a mixture of **18**<sup>S2</sup> (270 mg, 0.08 mmol), **24** (480 mg, 0.18 mmol), aqueous K<sub>2</sub>CO<sub>3</sub> (2 M, 0.3 mL), and Pd(PPh<sub>3</sub>)<sub>4</sub> (5 mg, 0.004 mmol) was transformed into **1c<sub>3</sub>** as a red solid (246 mg, 60%): mp 71-72 °C; <sup>1</sup>H NMR (400 MHz, CDCl<sub>3</sub>) δ 0.08 (s, 12 H), 0.09 (s, 12 H), 0.10 (s, 12 H), 0.82-0.97 (m, 102 H), 0.98-1.07 (ms, 21 H), 1.19-1.49 (m, 288 H), 1.51-1.75 (m, 33 H), 2.55 (t, *J* = 7.6 Hz, 4 H), 2.63-2.84 (m, 28 H), 3.67-3.77 (m, 12 H), 3.80-3.93 (m, 16 H), 4.06-4.17 (m, 12 H), 4.23 (t, *J* = 12.0 Hz, 2 H), 6.95 (s, 2 H); <sup>13</sup>C NMR (100 MHz, CDCl<sub>3</sub>) δ -5.5, 14.1, 16.9, 17.1, 18.3, 22.7, 25.9, 28.0, 28.4, 29.2, 29.4, 29.50, 29.56, 29.64, 29.71, 29.77, 30.0, 30.1, 30.3, 30.6, 32.0, 43.9, 44.2, 65.7, 65.9, 76.6, 114.32, 114.34, 114.39, 114.50, 114.53, 114.60, 114.77, 114.85, 120.2, 127.6, 127.7, 127.8, 127.9, 128.0, 139.9, 140.5, 140.61, 140.64, 142.6, 145.7, 145.90, 145.96; IR (KBr) ν 3445, 2955, 2920, 2850, 1467, 1255, 1068, 837, 775, 720 cm<sup>-1</sup>; HRMS (MALDI) (M) calcd for C<sub>323</sub>H<sub>556</sub>O<sub>21</sub>S<sub>15</sub>Si<sub>6</sub>: 5419.6865; found: 5419.7009; GPC (THF):  $M_n$  = 6840, PDI = 1.01.

**TBS-protected 1b<sub>6</sub> (1a<sub>6</sub>)**

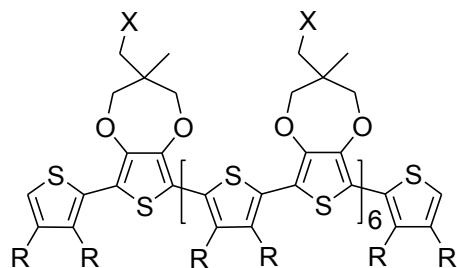

**1a<sub>6</sub>** X = OSi(*t*-C<sub>4</sub>H<sub>9</sub>)(CH<sub>3</sub>)<sub>2</sub>, R = C<sub>12</sub>H<sub>25</sub>

In a manner similar to that described for the synthesis of **1a<sub>0</sub>**, a mixture of **1c<sub>3</sub>** (246 mg, 0.05 mmol), imidazole (12 mg, 0.18 mmol), and tert-butyldimethylsilyl chloride (13 mg, 0.09 mmol) was transformed into **1a<sub>6</sub>** as a red solid (224 mg, 89%): mp 78-80 °C; <sup>1</sup>H NMR (400 MHz, CDCl<sub>3</sub>) δ 0.02-0.18 (ms, 42 H), 0.82-1.00 (m, 111 H), 0.99-1.09 (ms, 21 H), 1.20-1.50 (m, 288 H), 1.50-1.65 (m, 28 H), 1.68 (quint, *J* = 7.5 Hz, 4 H), 2.55 (t, *J* = 7.5 Hz, 4 H), 2.63-2.95 (m, 28 H), 3.65-3.79 (m, 14 H), 3.80-3.96 (m, 14 H), 4.05-4.24 (m, 14 H), 6.97 (s, 2 H); <sup>13</sup>C NMR (100 MHz, CDCl<sub>3</sub>) δ -5.5, 14.1, 17.0, 18.1, 18.3, 25.6, 26.7, 25.9, 28.0, 28.4, 29.2, 29.4, 29.5, 29.6, 29.67, 29.71, 29.8, 30.0, 30.1, 30.4, 30.6, 32.0, 44.2, 65.9, 76.6, 114.3, 114.5, 114.8, 120.2, 127.7, 127.9, 139.9, 140.0, 142.6, 145.9; IR (KBr) ν 2957, 2920, 2851, 1467, 1340, 1378, 1257, 1197, 1183, 1047, 957, 850, 721 cm<sup>-1</sup>; HRMS (MALDI) (*M*) calcd for C<sub>329</sub>H<sub>570</sub>O<sub>21</sub>S<sub>15</sub>Si<sub>7</sub>: 5533.7730; found: 5533.7913; GPC (THF): *M<sub>n</sub>* = 6635, PDI = 1.01.

**Alternating octakis-(3,4-didodecylthiophene)-heptakis- (hydroxymethyl-substituted-3,4-dioxythiophene) pentadecamer (1b<sub>6</sub>)**

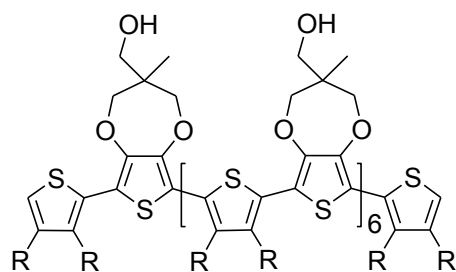

**1b<sub>6</sub>** R = C<sub>12</sub>H<sub>25</sub>

In a manner similar to that described for the synthesis of **1b<sub>2</sub>**, a mixture of **1a<sub>6</sub>** (224 mg, 0.04 mmol), and tetra-*n*-butylammonium fluoride (1 M in THF, 0.56 mL, 0.56

mmol) was transformed into **1b<sub>6</sub>** as a red solid (170 mg, 89%): mp 158-159 °C; <sup>1</sup>H NMR (400 MHz, CDCl<sub>3</sub>) δ 0.82-0.93 (m, 48 H), 0.89-0.95 (ms, 21 H), 1.17-1.46 (m, 288 H), 1.48-17.5 (m, 39 H), 2.45 (t, *J* = 7.8 Hz, 4 H), 2.59-2.80 (m, 28 H), 3.74-3.91 (m, 28 H), 4.14-4.29 (m, 14 H), 6.94 (s, 2 H); <sup>13</sup>C NMR (100 MHz, CDCl<sub>3</sub>) δ 14.1, 17.0, 22.7, 28.0, 28.4, 29.2, 29.4, 29.49, 29.55, 29.69, 29.75, 30.0, 30.1, 30.4, 30.7, 31.9, 43.9, 65.7, 76.5, 114.5, 114.8, 115.2, 120.3, 127.3, 127.7, 140.2, 140.6, 140.7, 142.7, 145.67, 145.75; IR (KBr) ν 3424, 2955, 2920, 2849, 1493, 1468, 1421, 1378, 1364, 1261, 1157, 1047, 954, 926, 876, 720 cm<sup>-1</sup>; HRMS (MALDI) (*M* + *H*) calcd for C<sub>287</sub>H<sub>473</sub>O<sub>21</sub>S<sub>15</sub>: 4736.1755; found: 4736.1749; GPC (THF): *M<sub>n</sub>* = 6356, PDI = 1.01.

## References

- S1. Ko, S.; Verploegen, E.; Hong, S.; Mondal, R.; Hoke, E. T.; Toney, M. F.; McGehee, M. D.; Bao, Z. *J. Am. Chem. Soc.* **2011**, *133*, 16722–16725.
- S2. Nantalaksakul, A.; Krishnamoorthy, K.; Thayumanavan, S. *Macromolecules* **2010**, *43*, 37–43.

$^1\text{H}$  and  $^{13}\text{C}$  NMR spectra for all new compounds

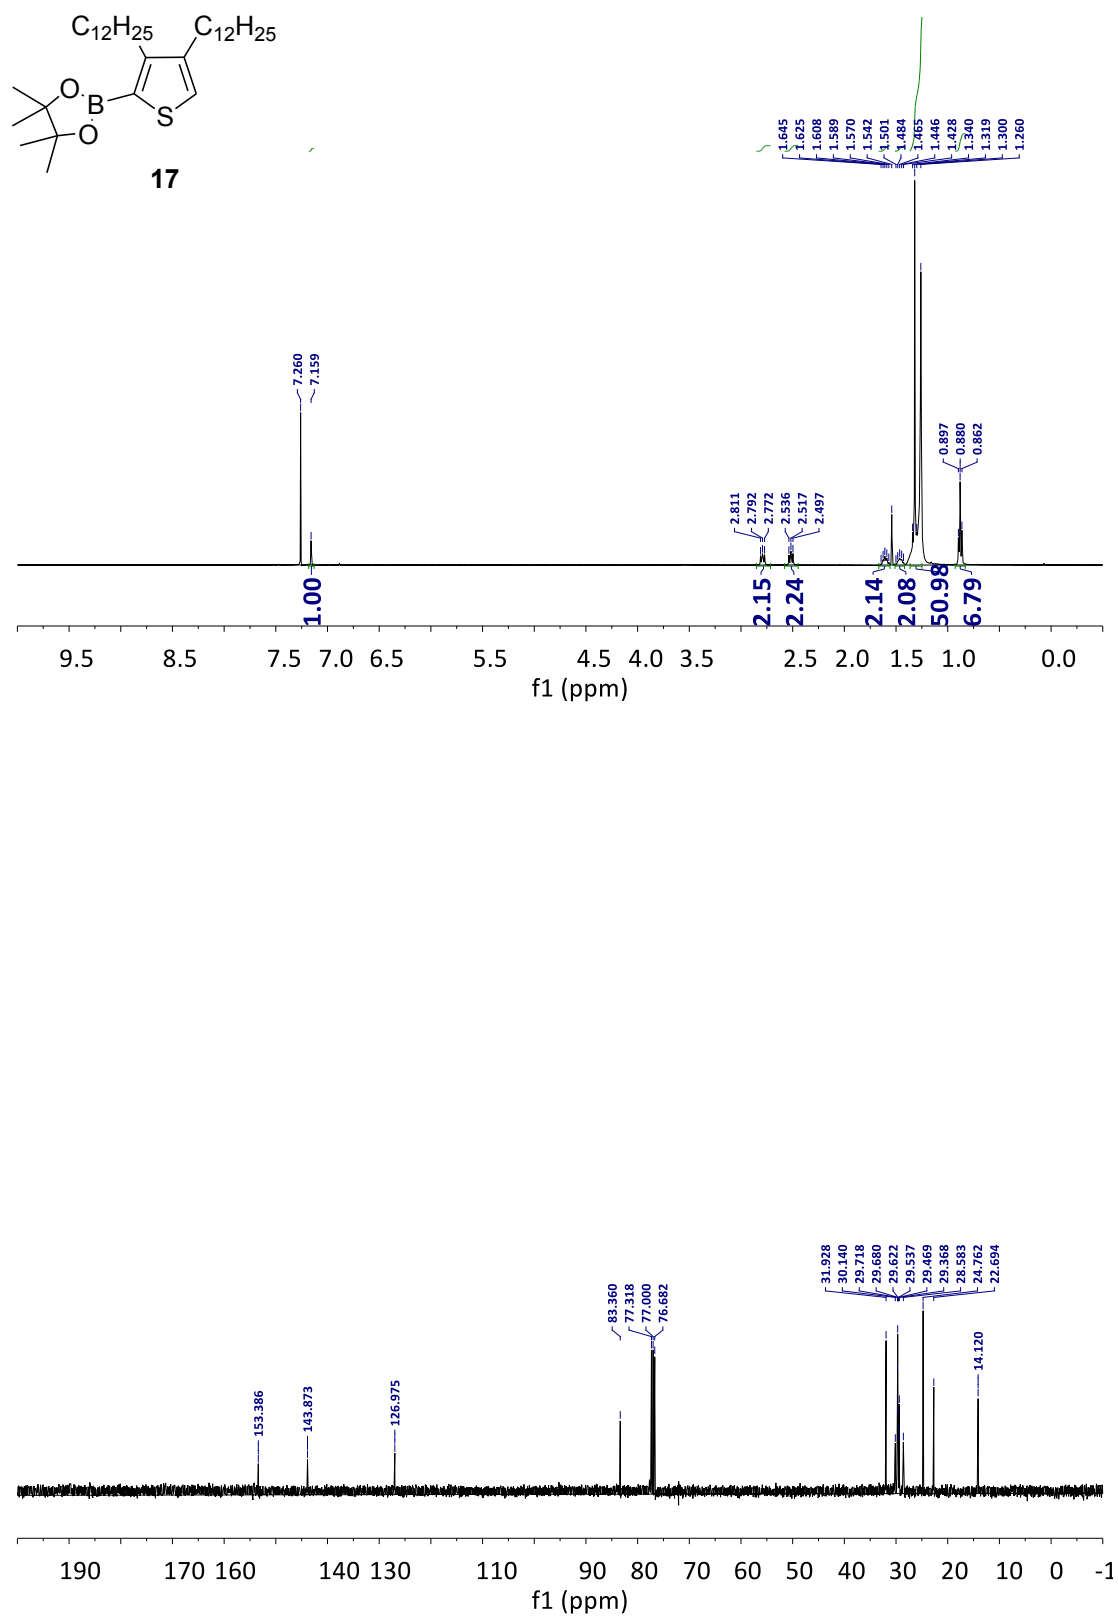

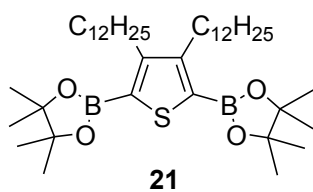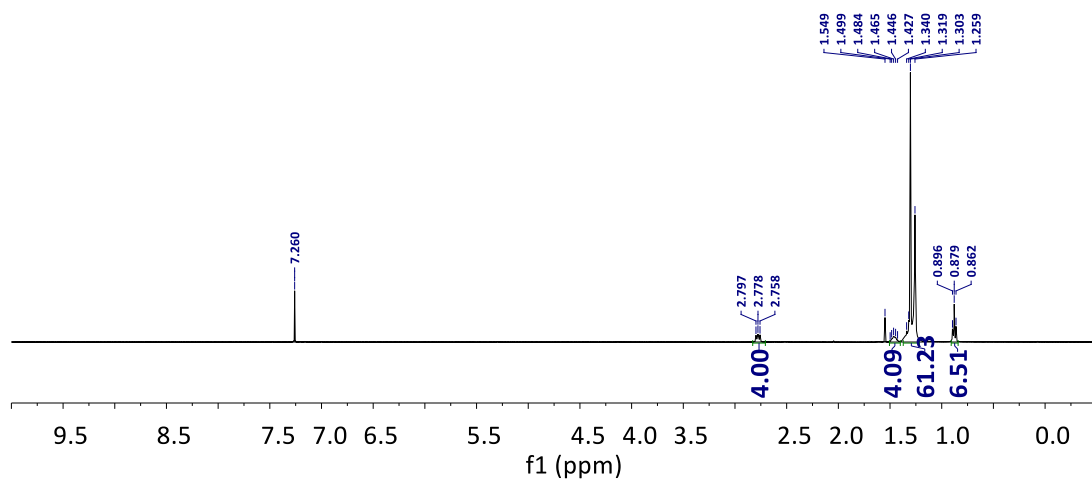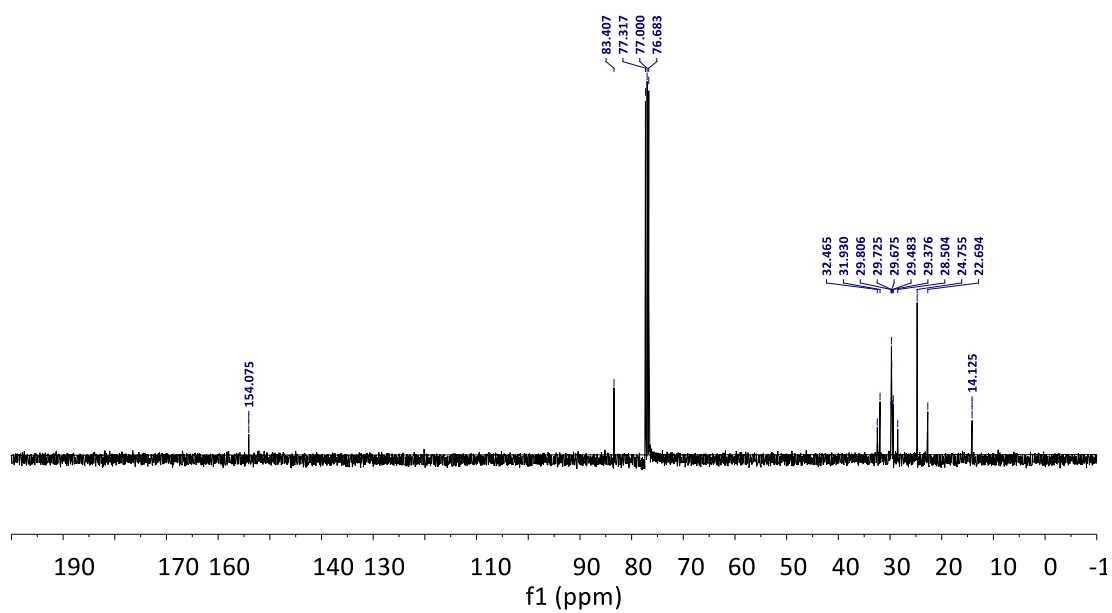

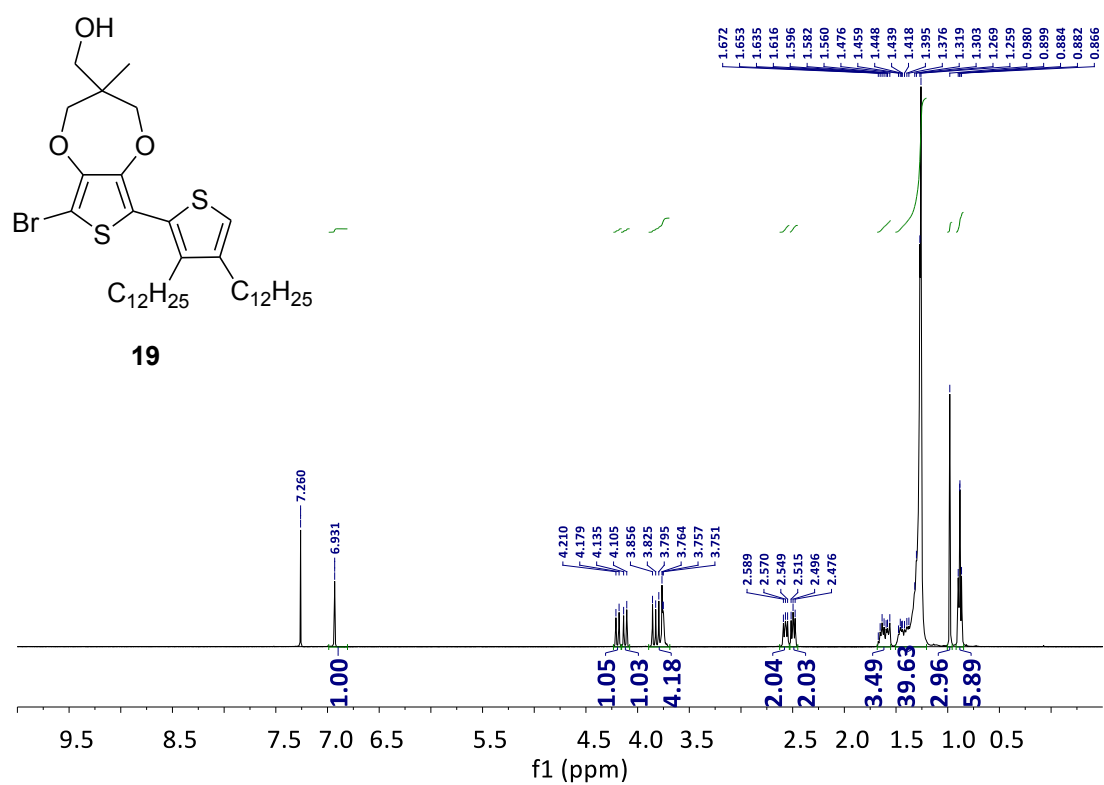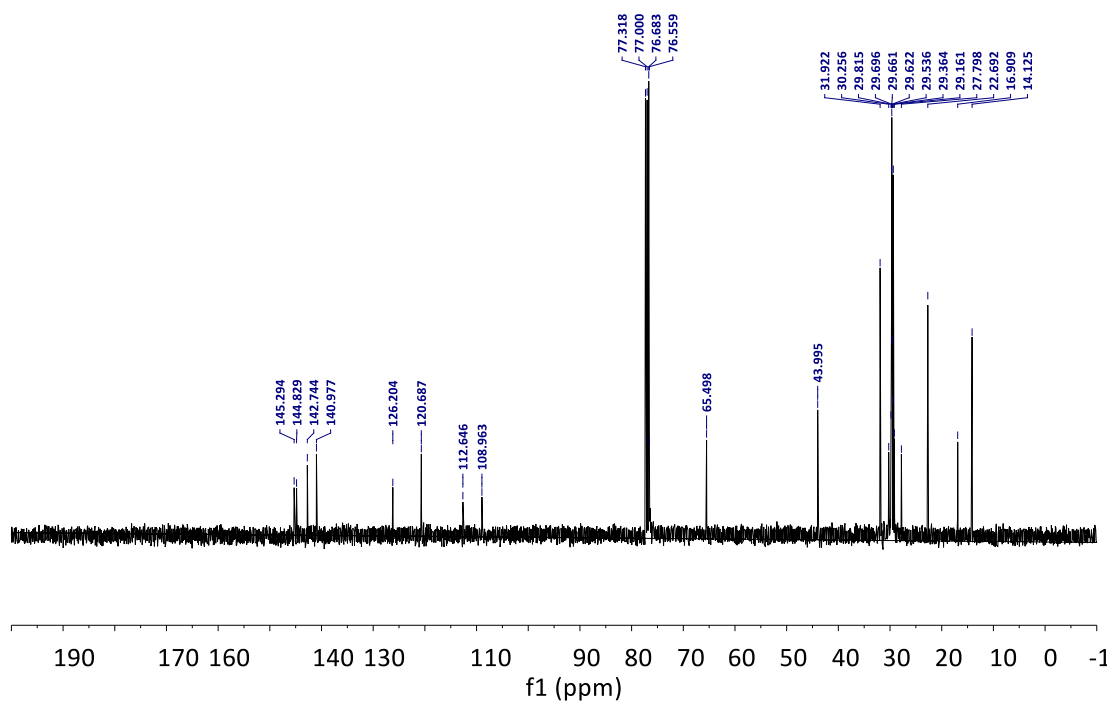



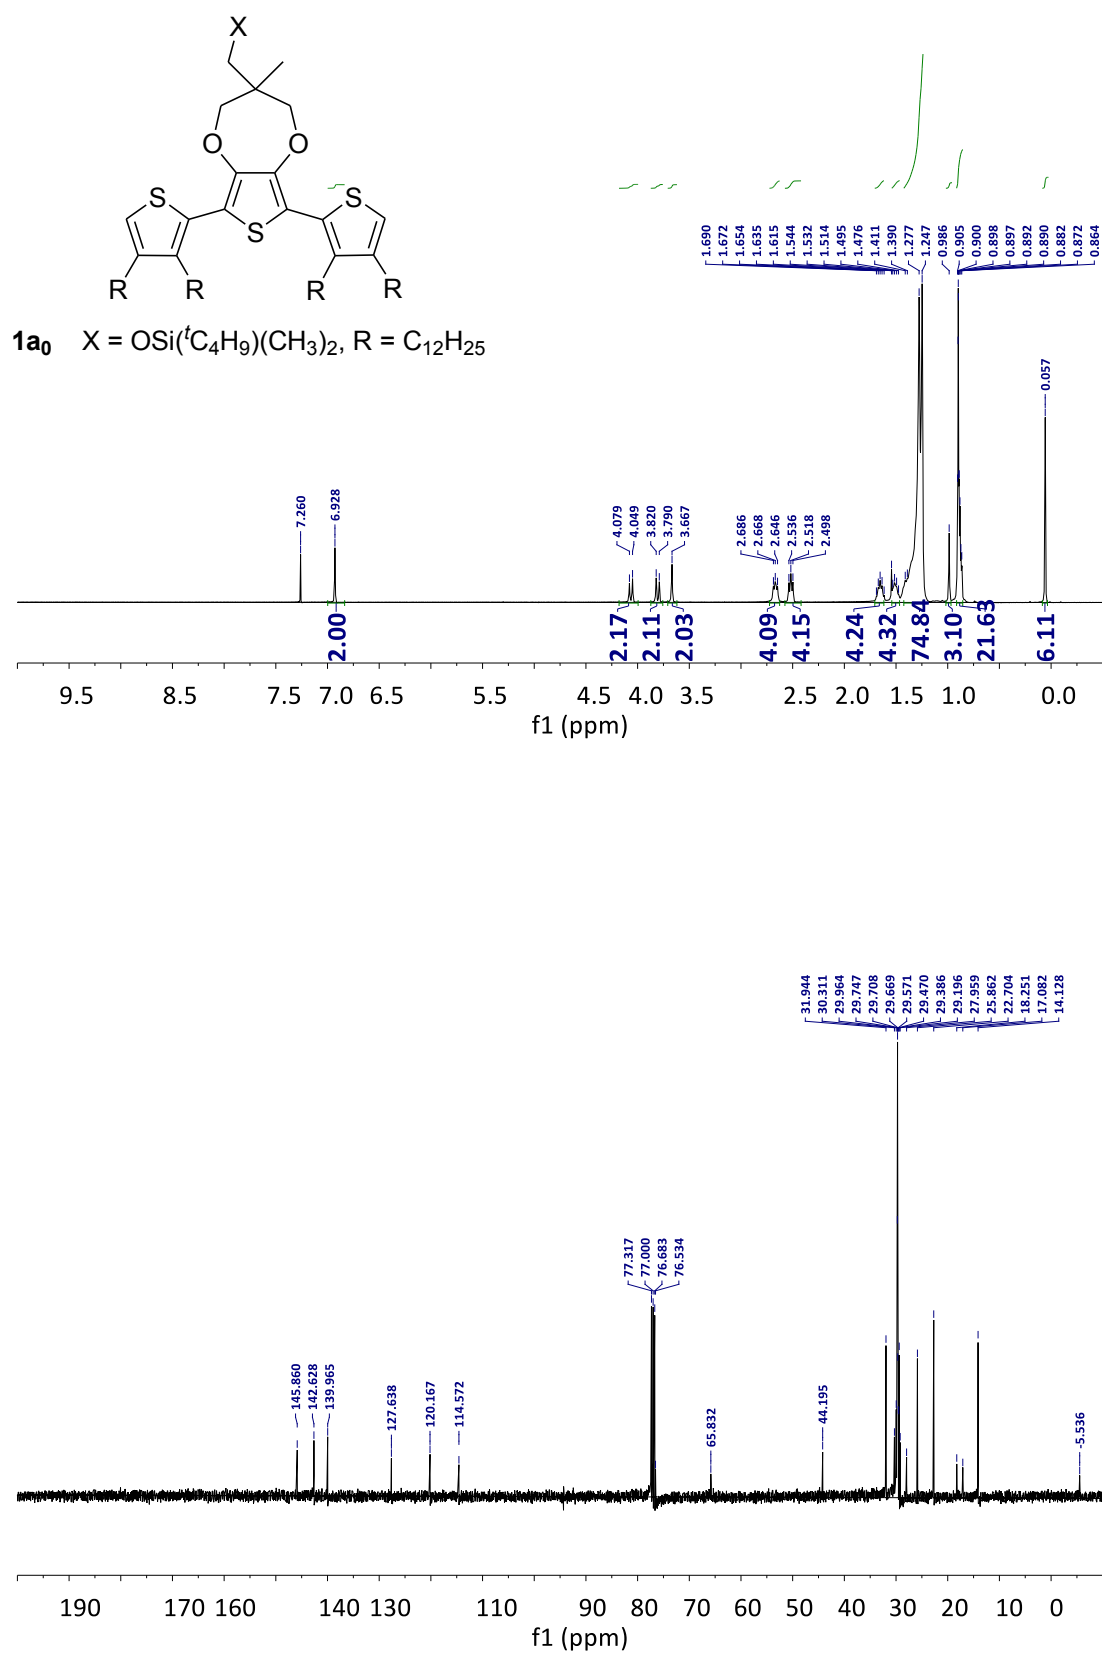

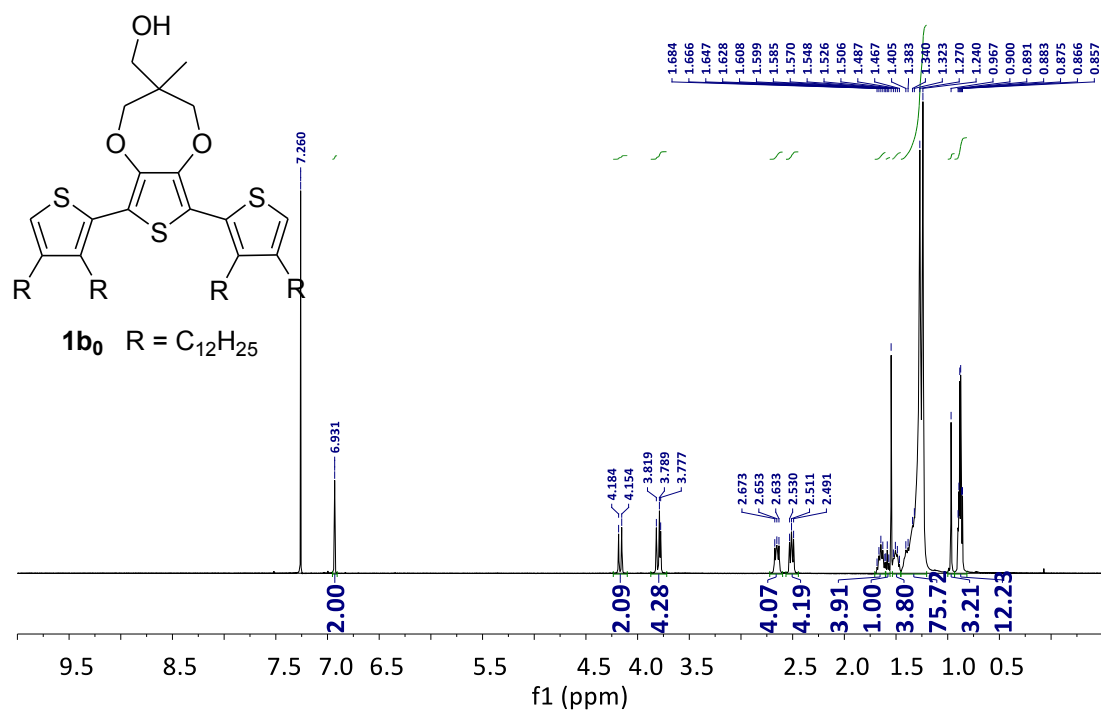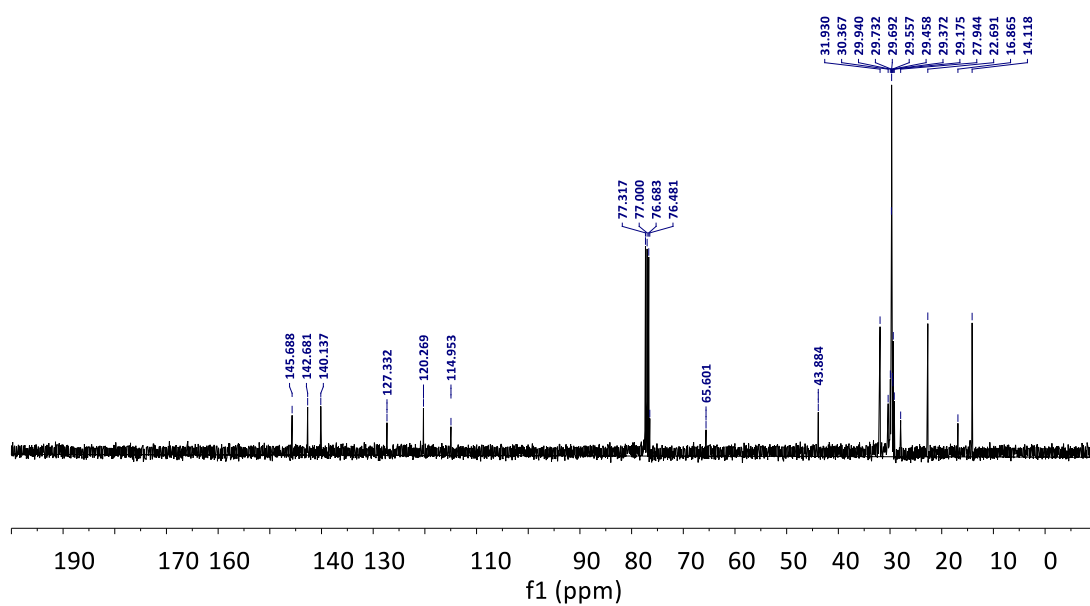

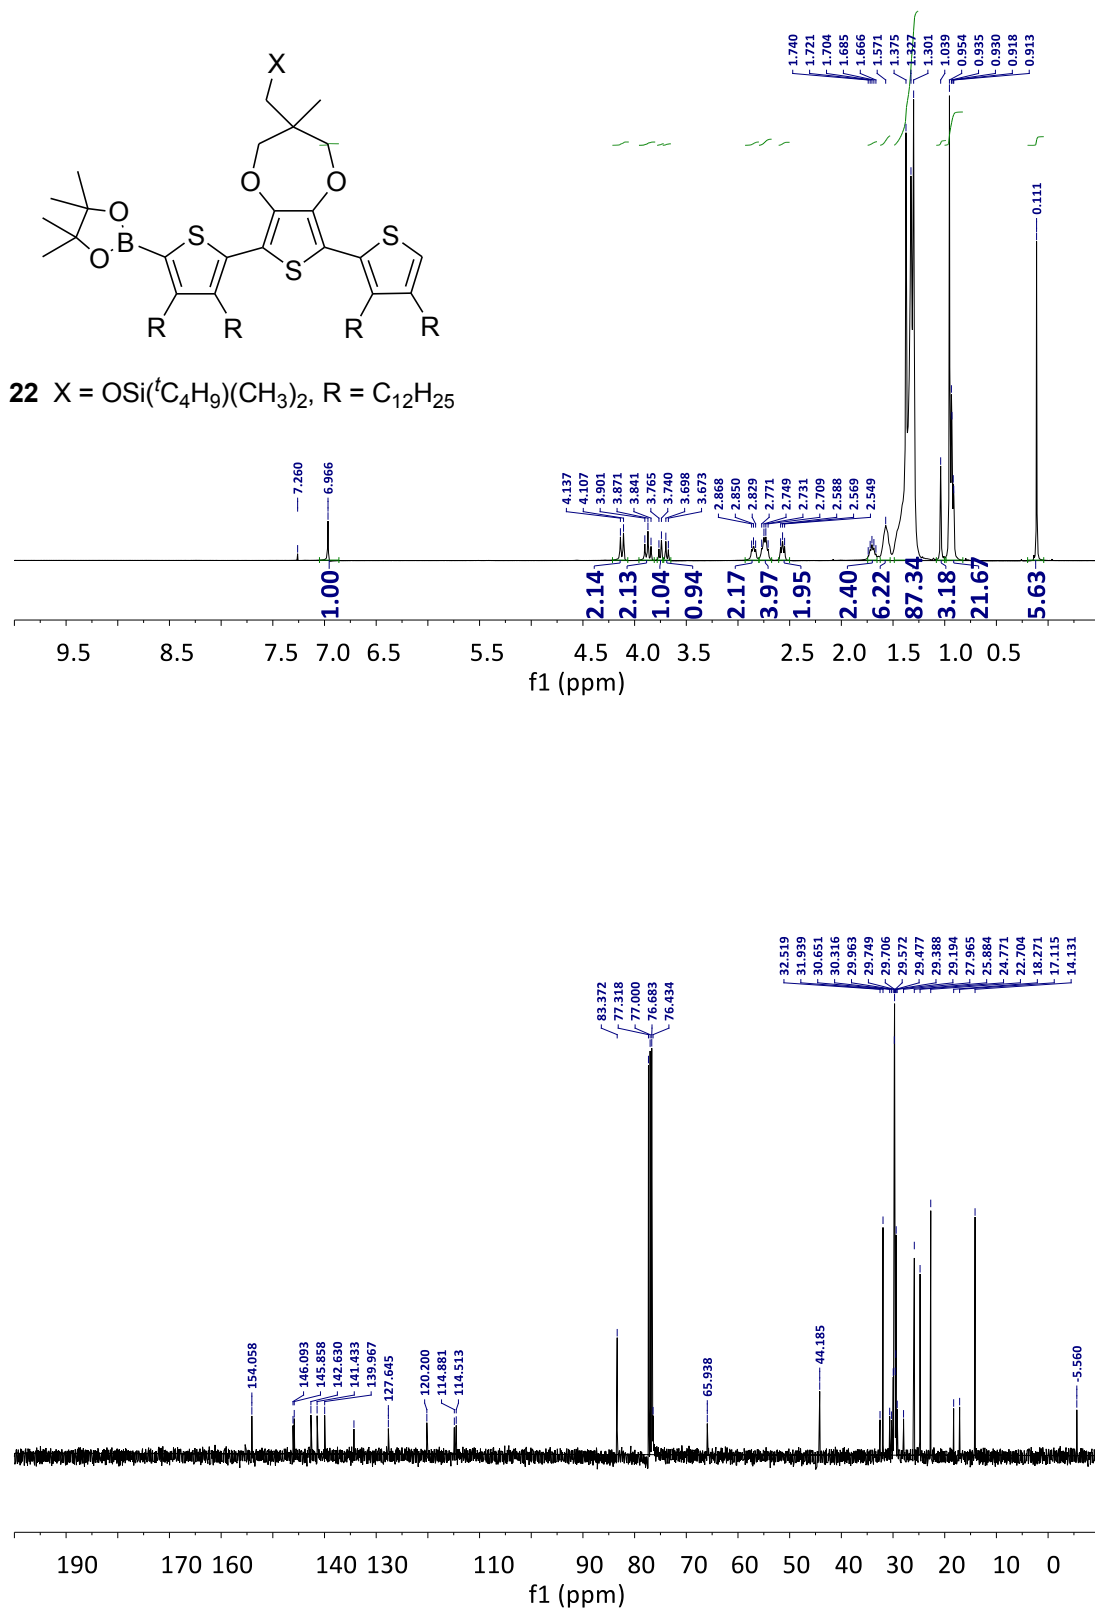

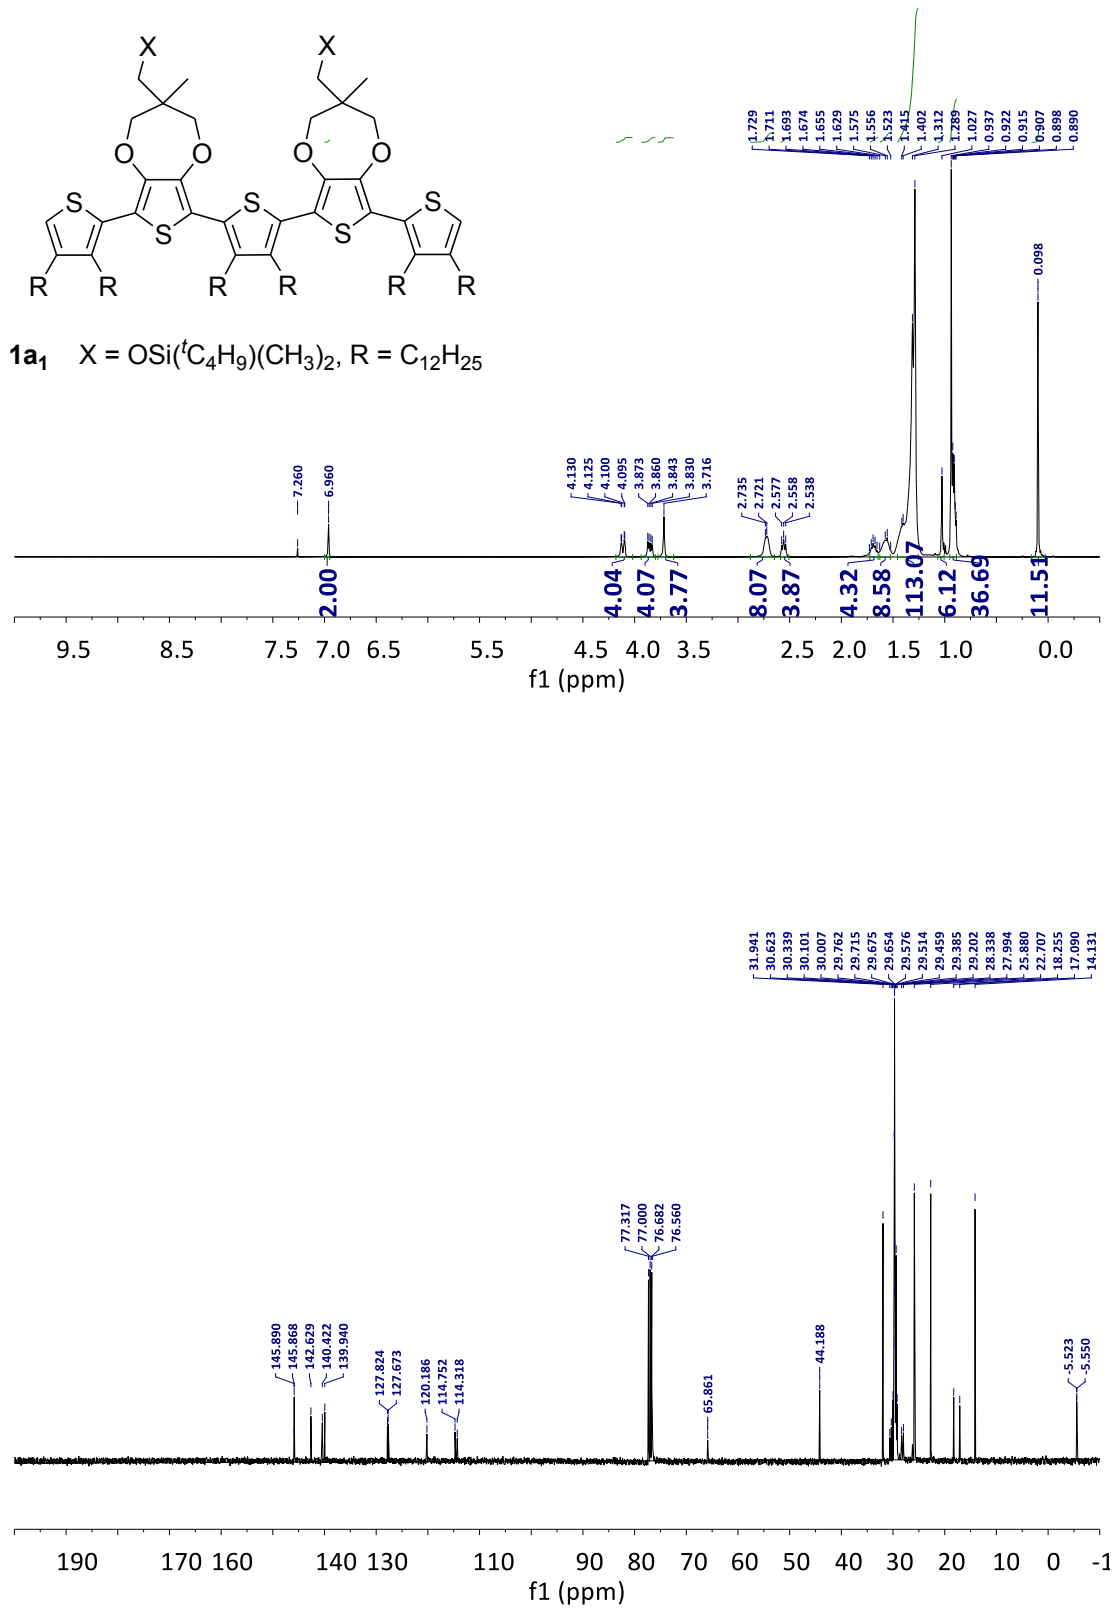

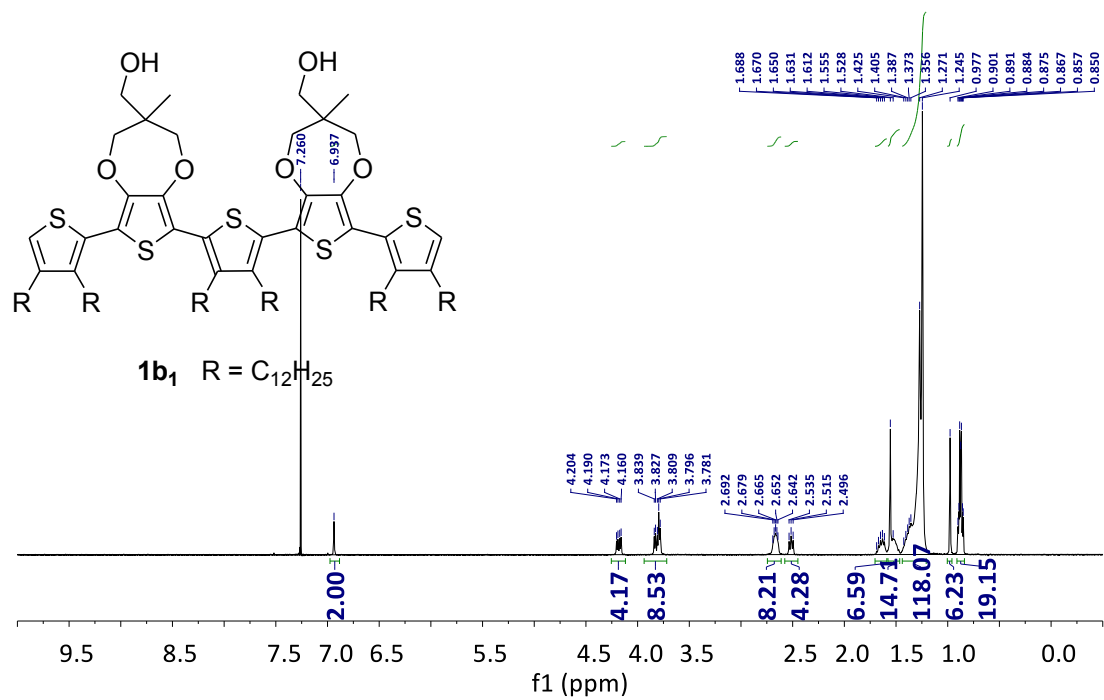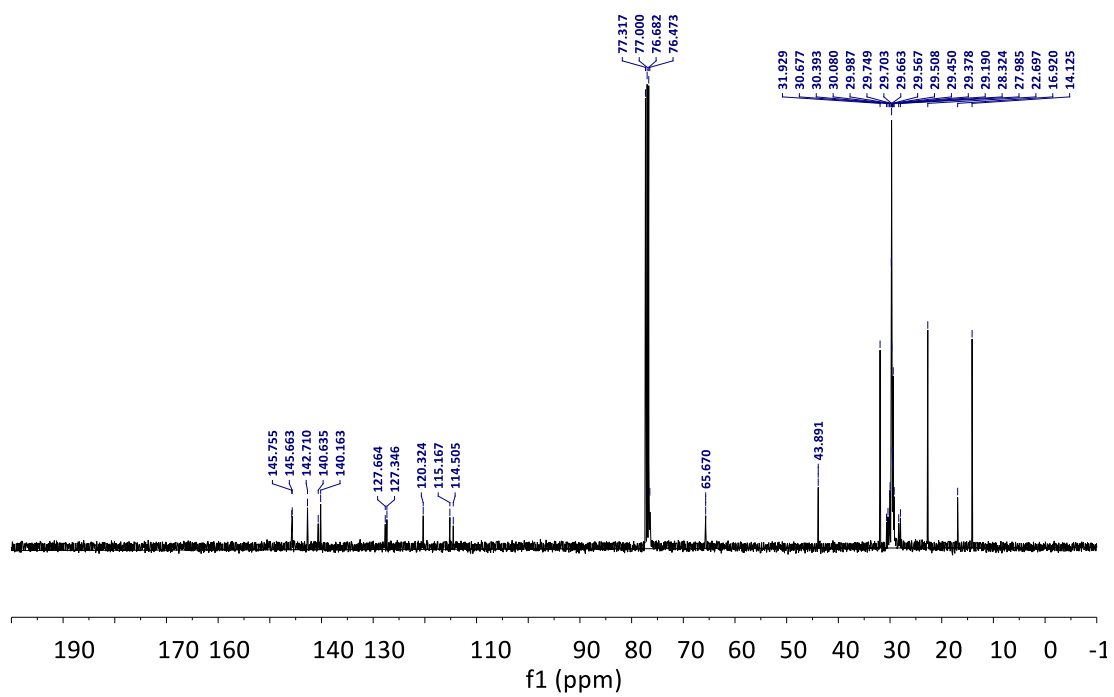

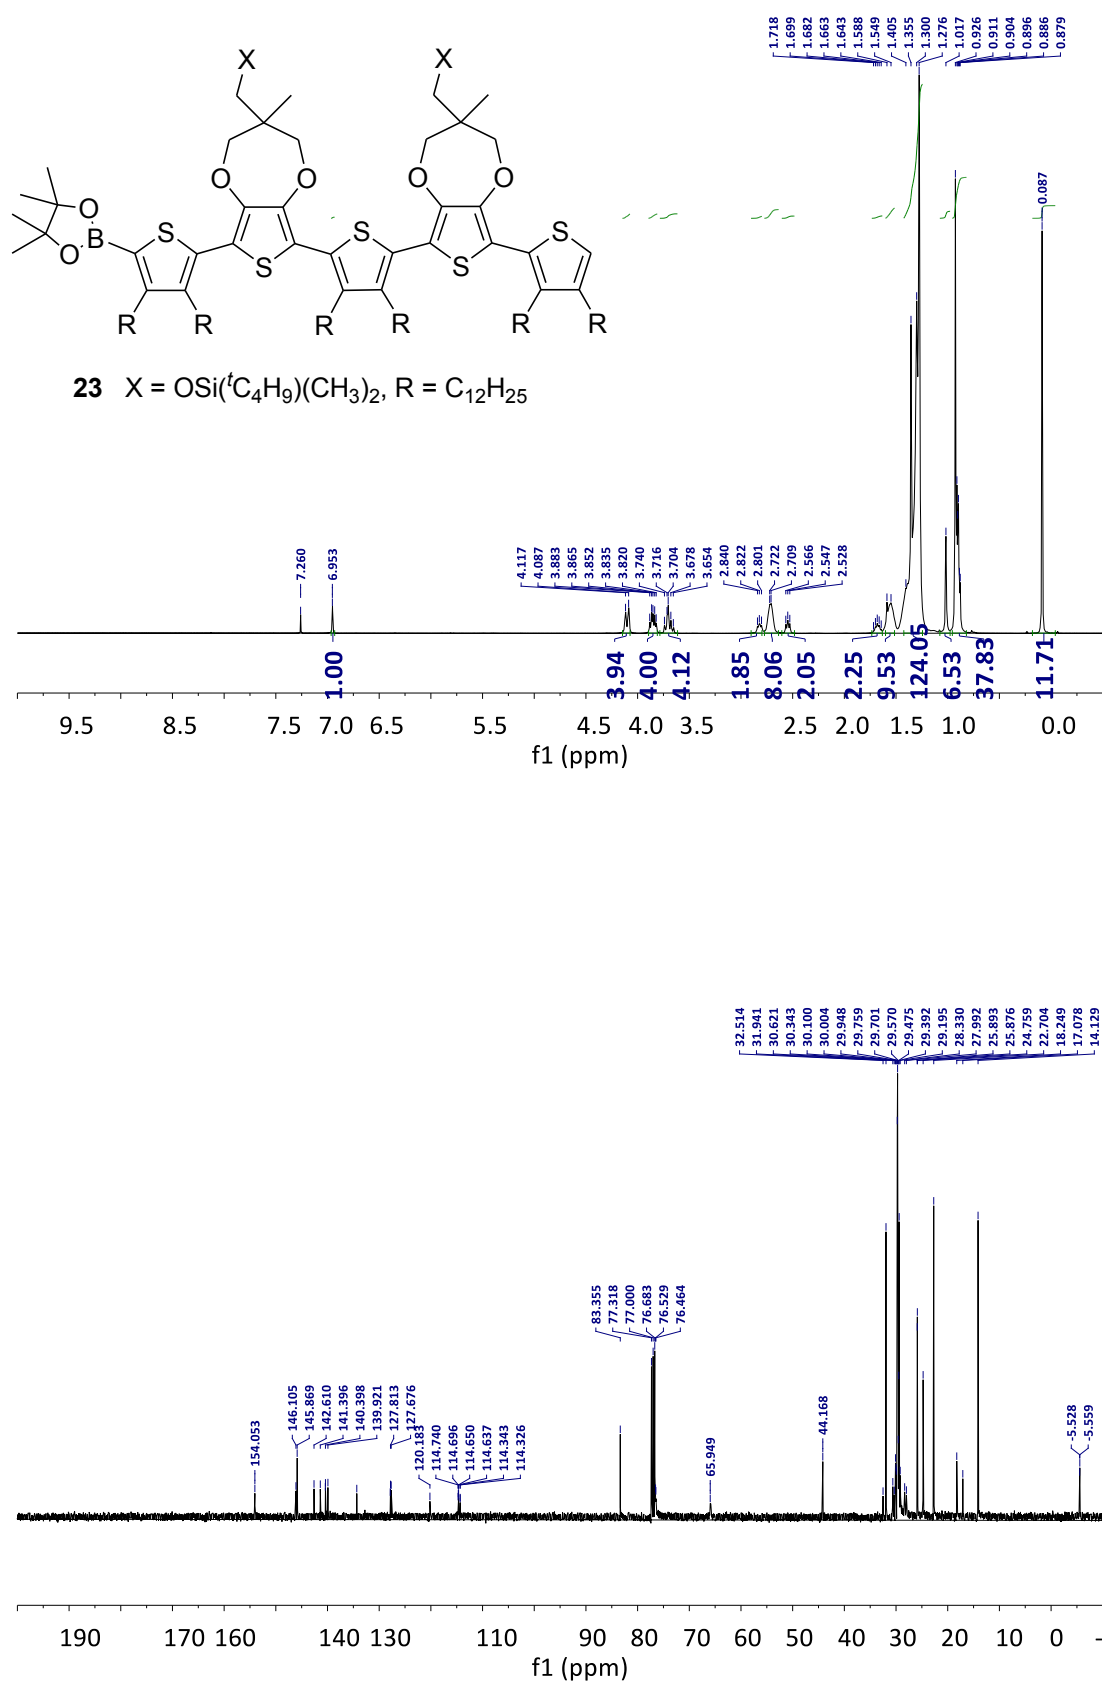

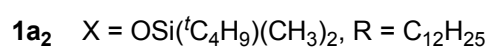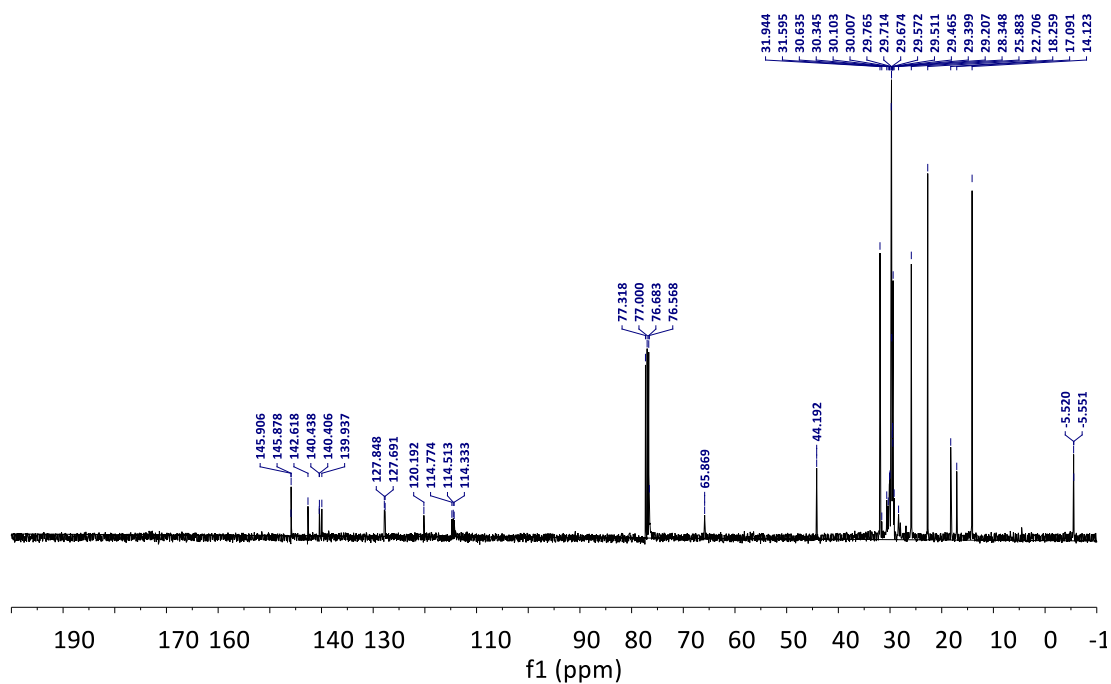

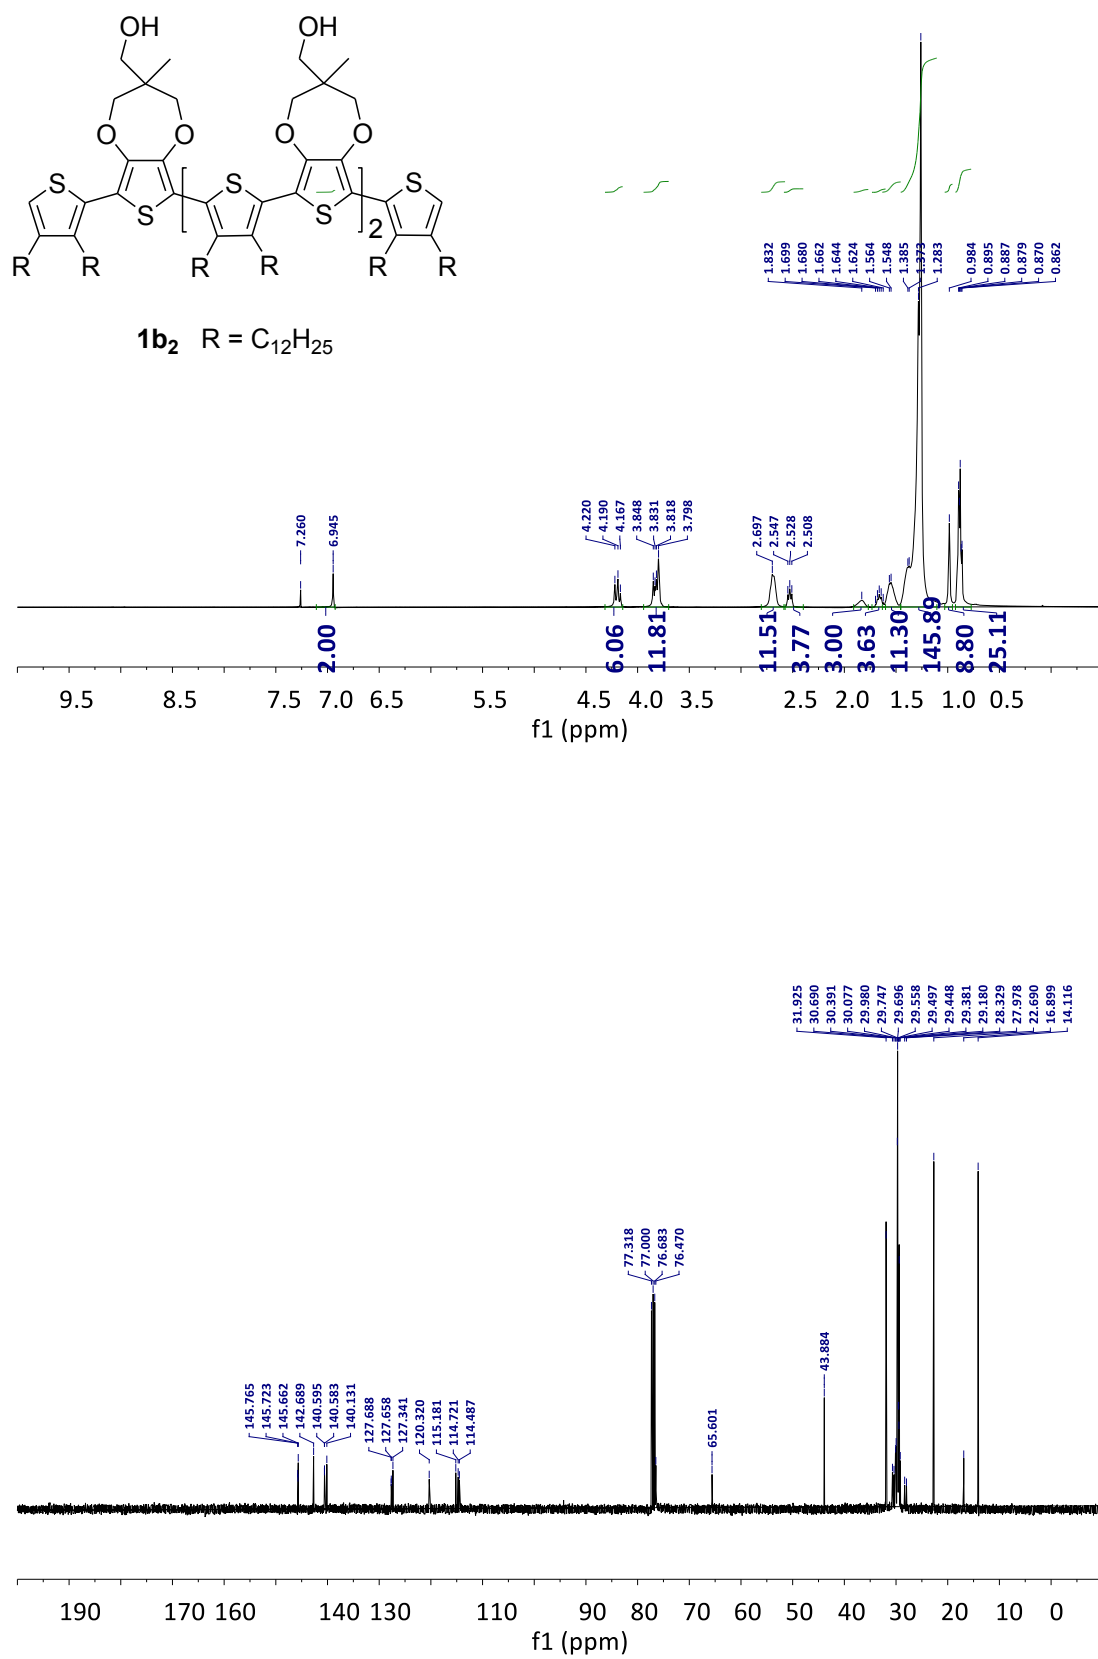



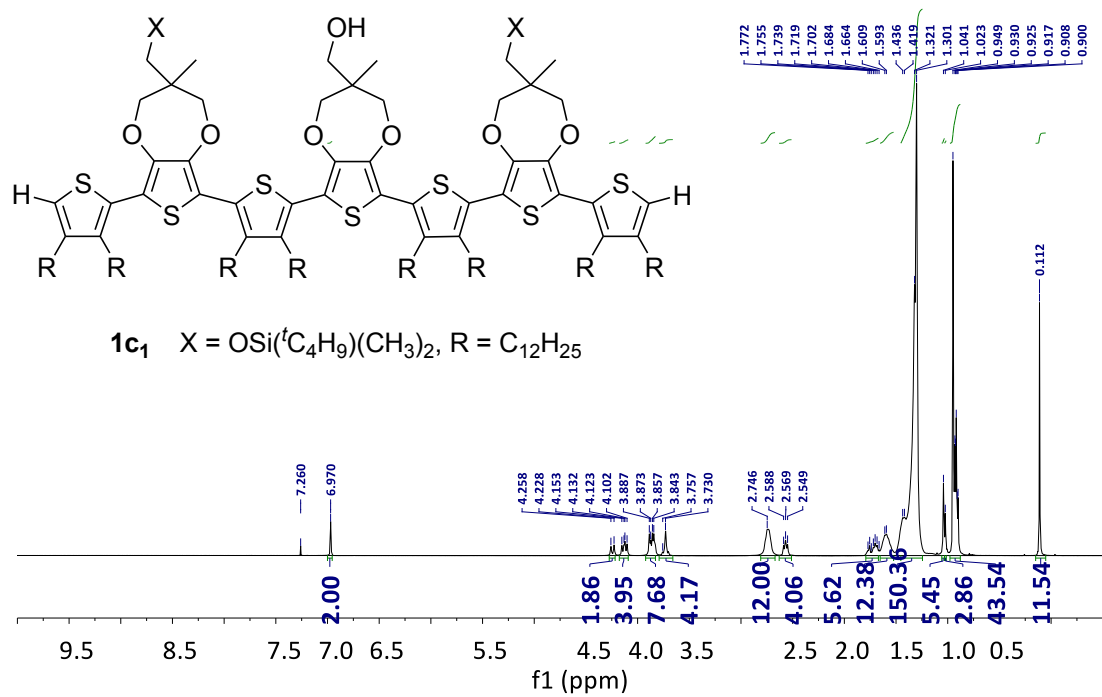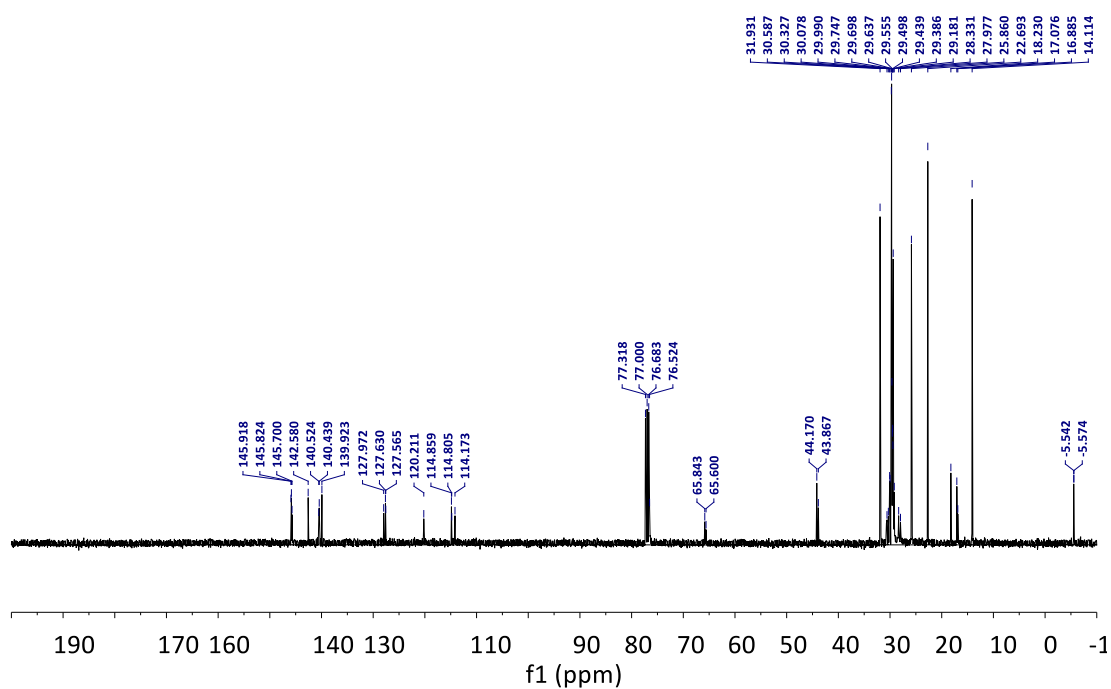

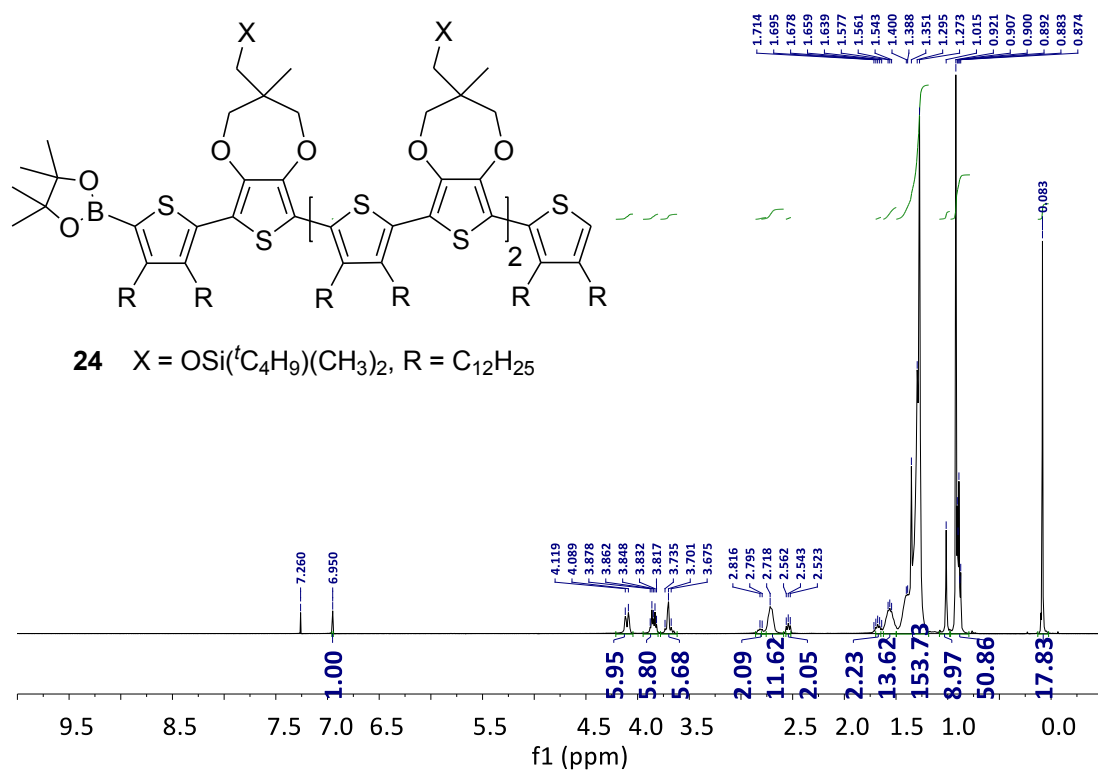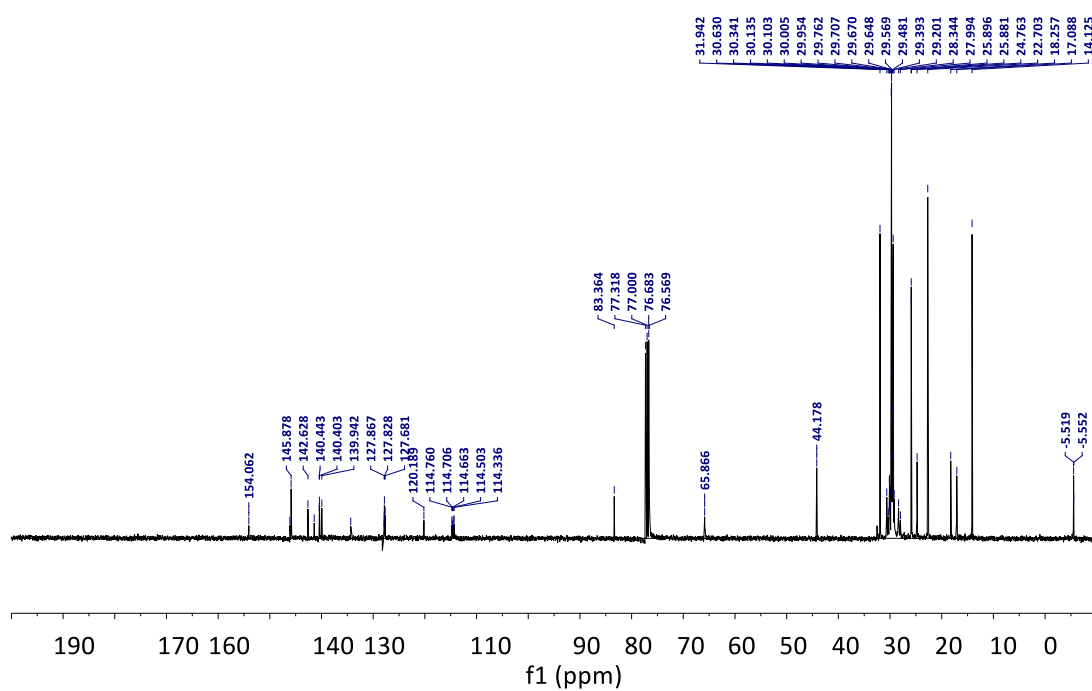

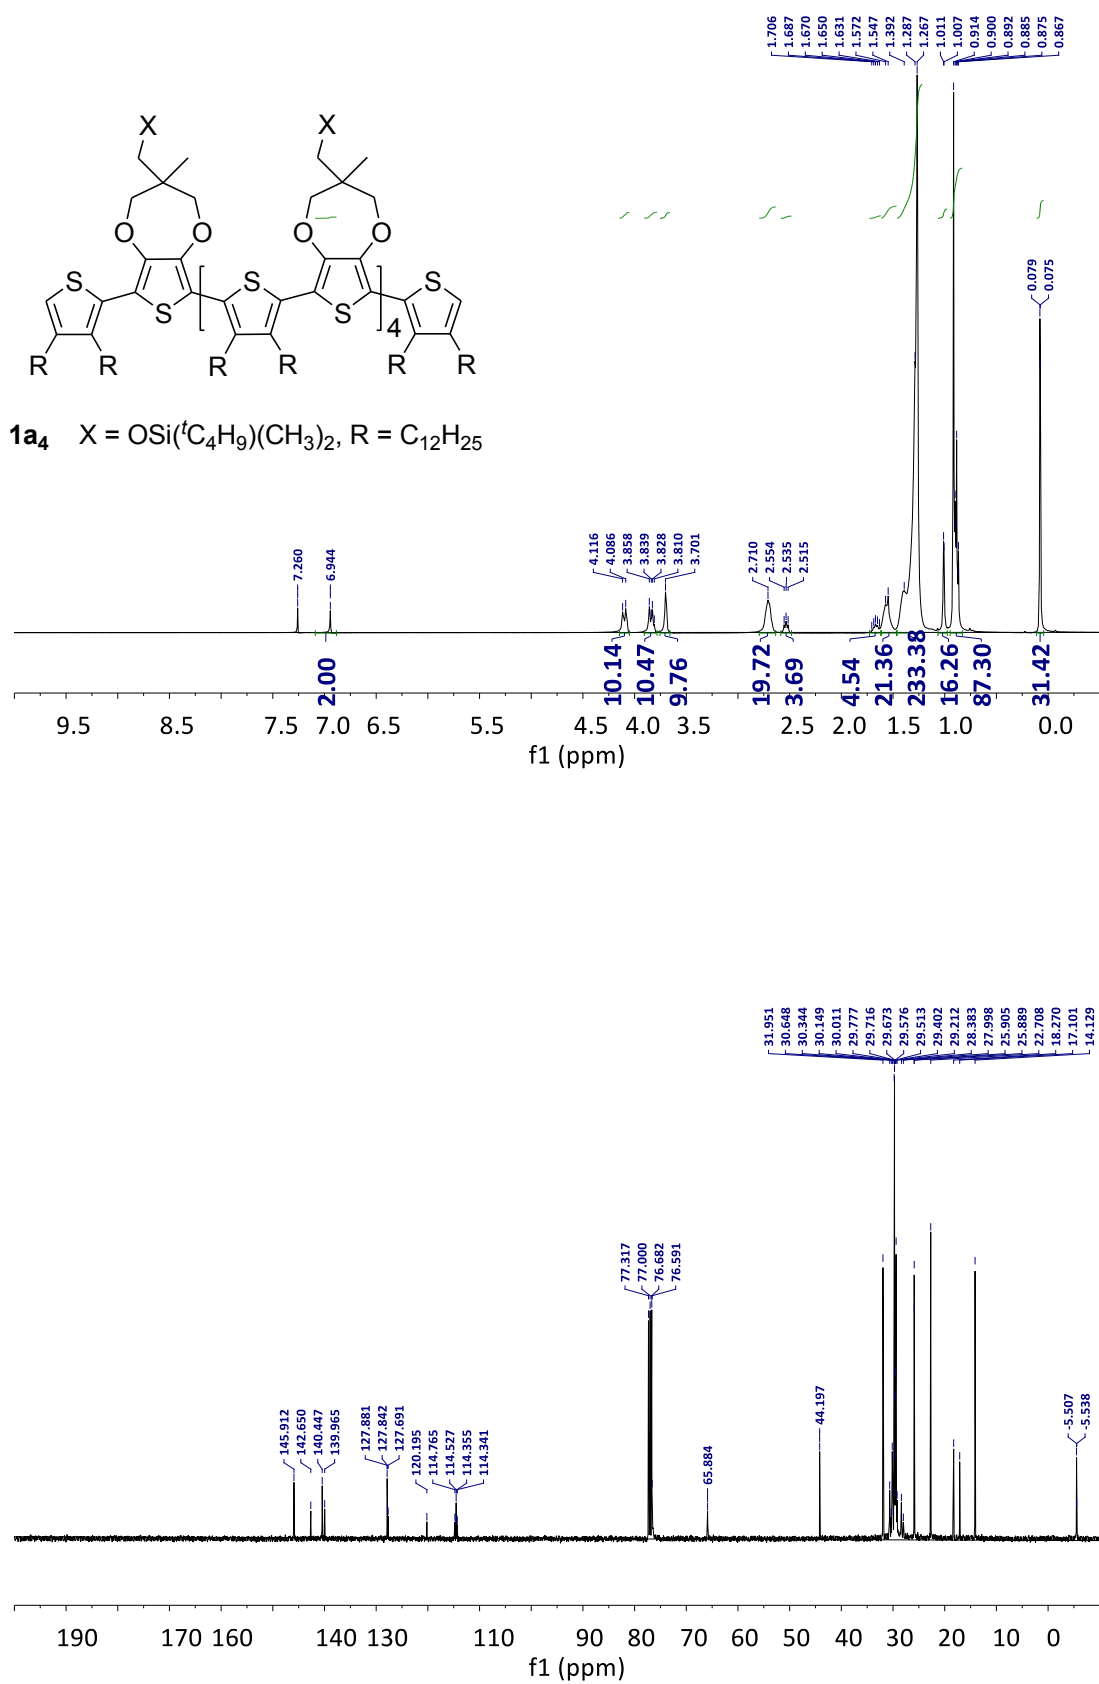

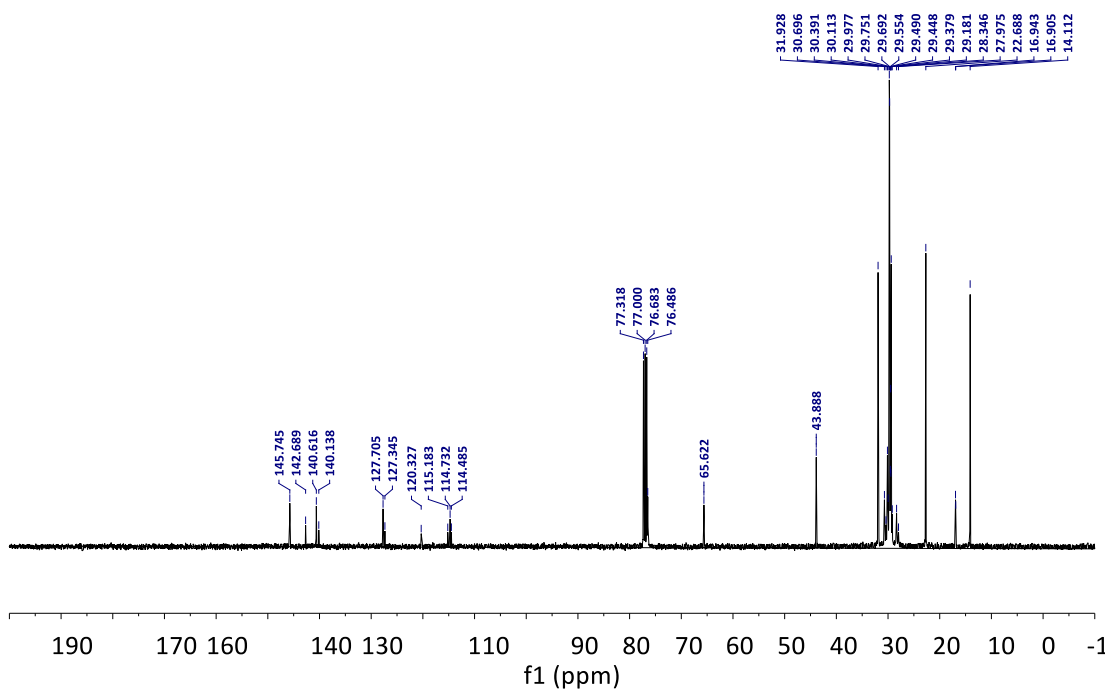

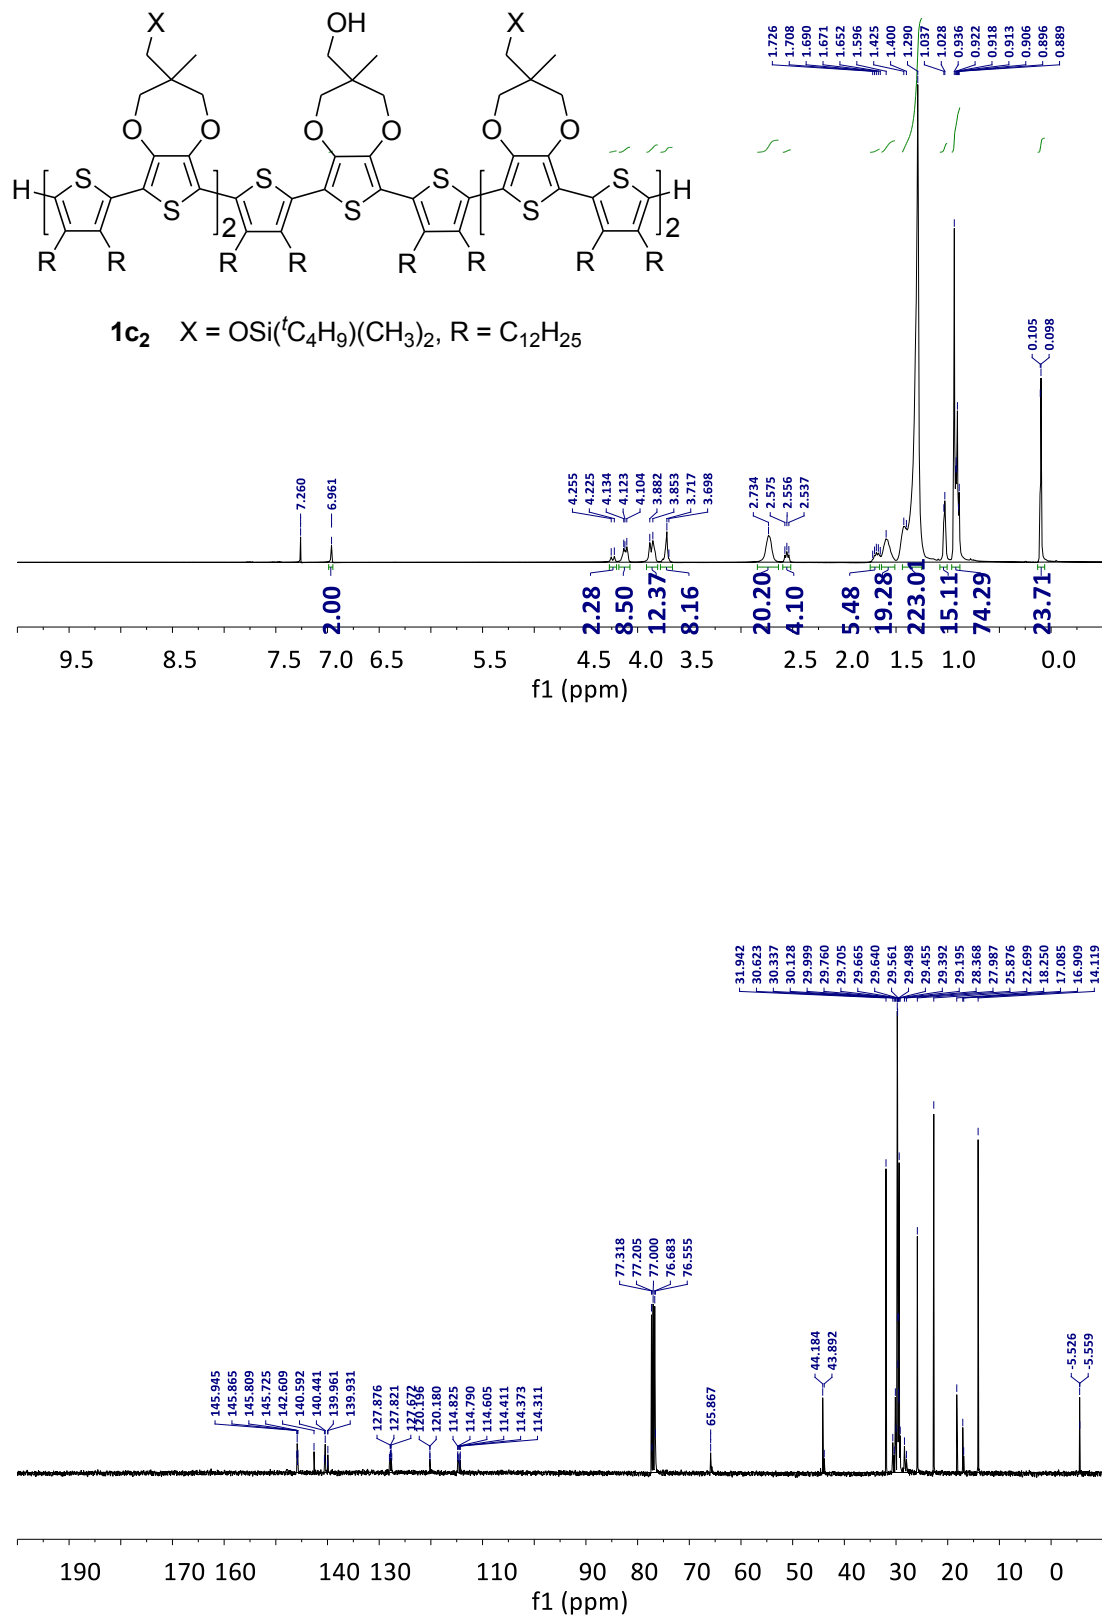

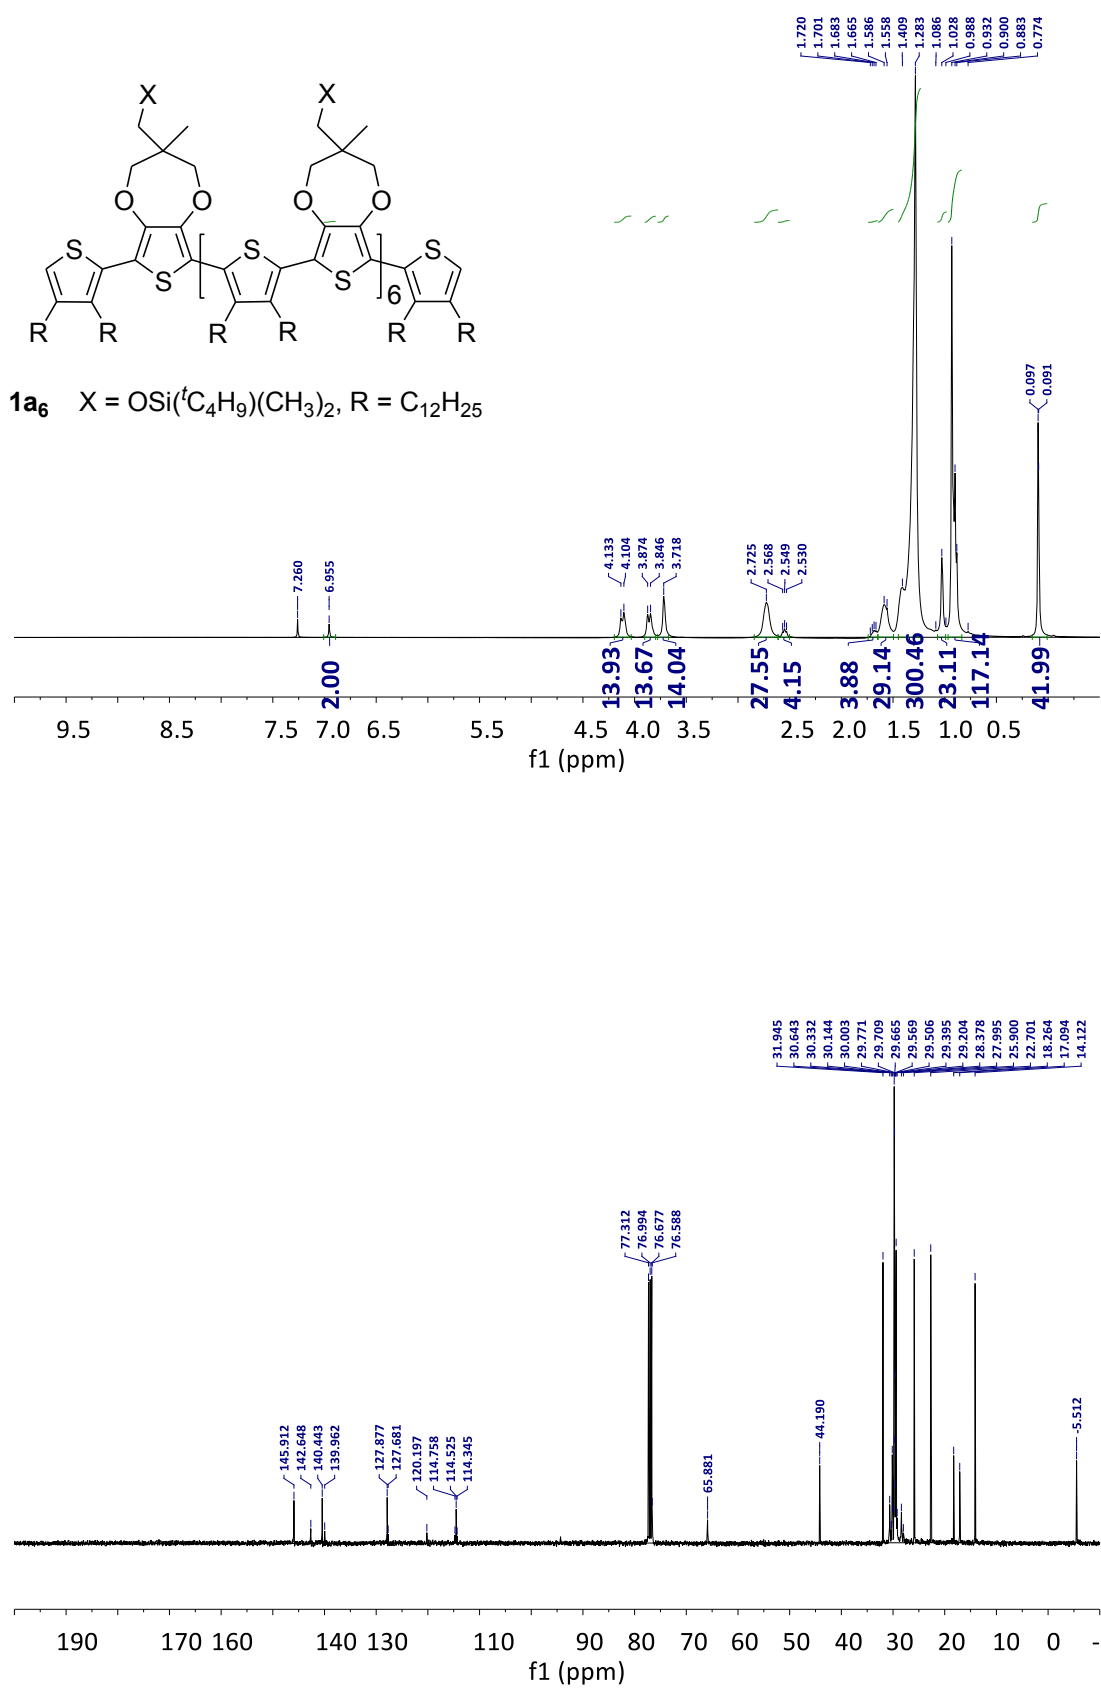

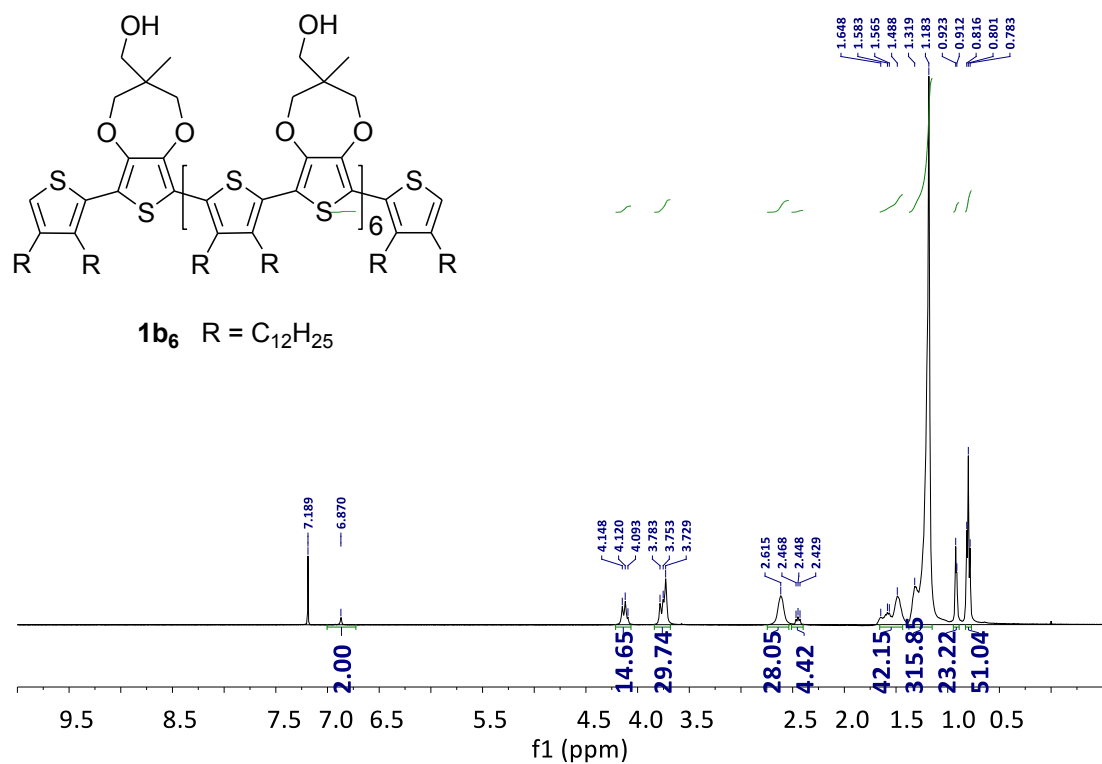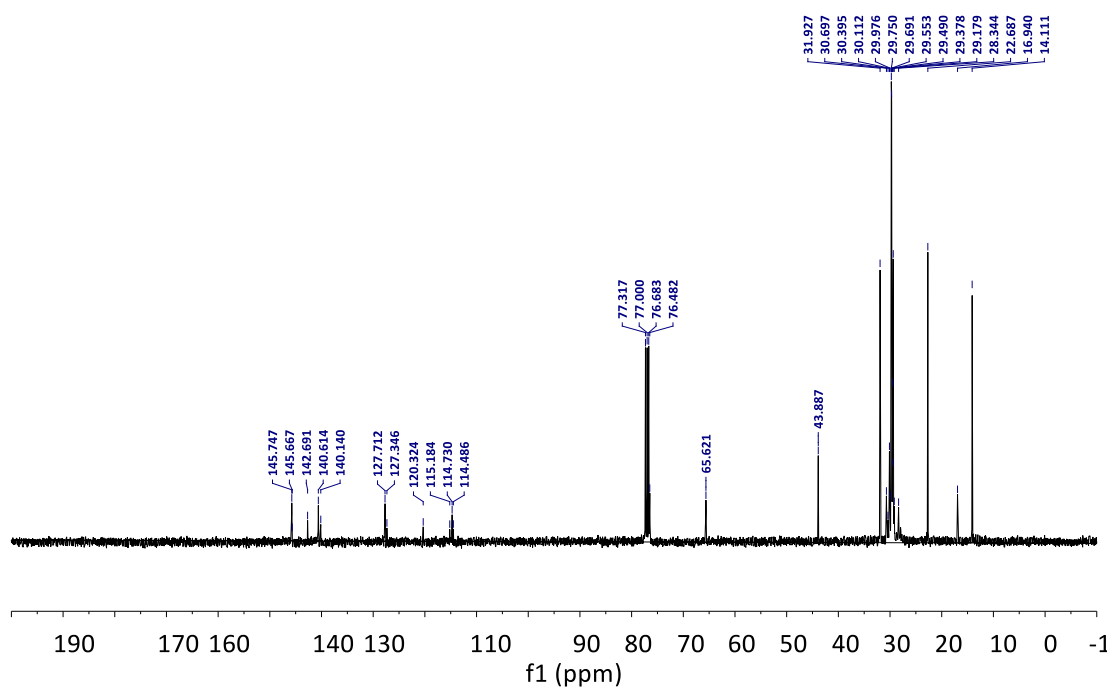

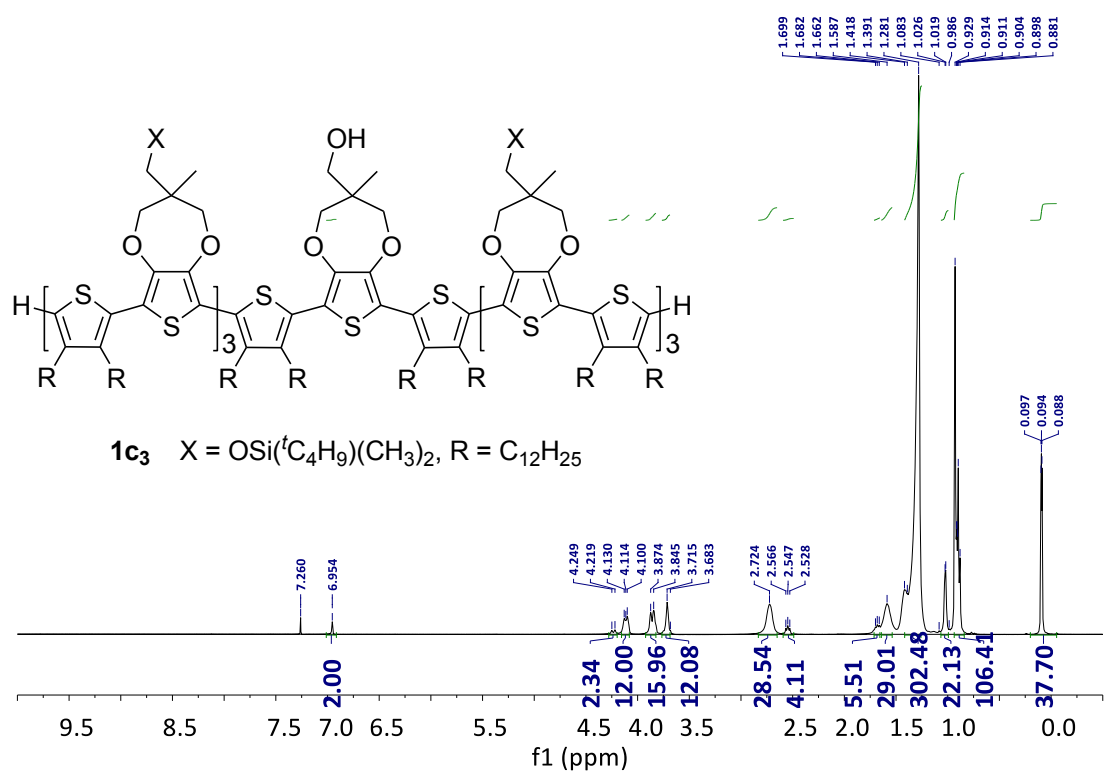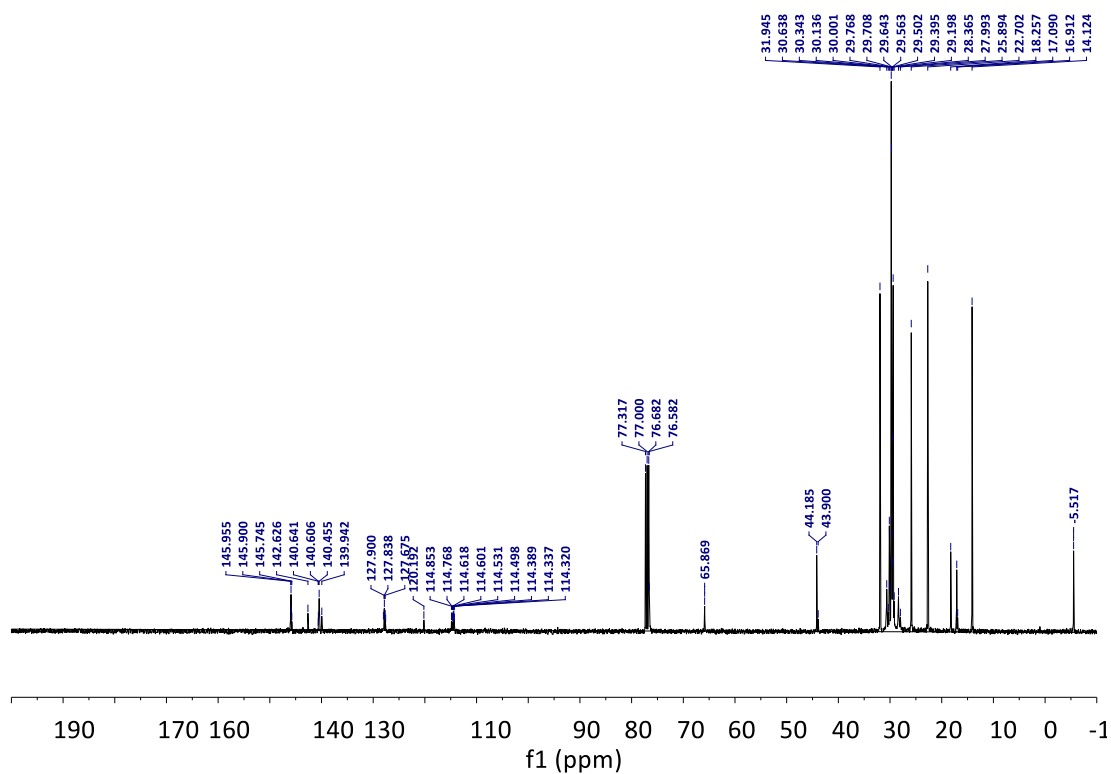



# GPC profiles for **1a**, **1b**, and **1c**.

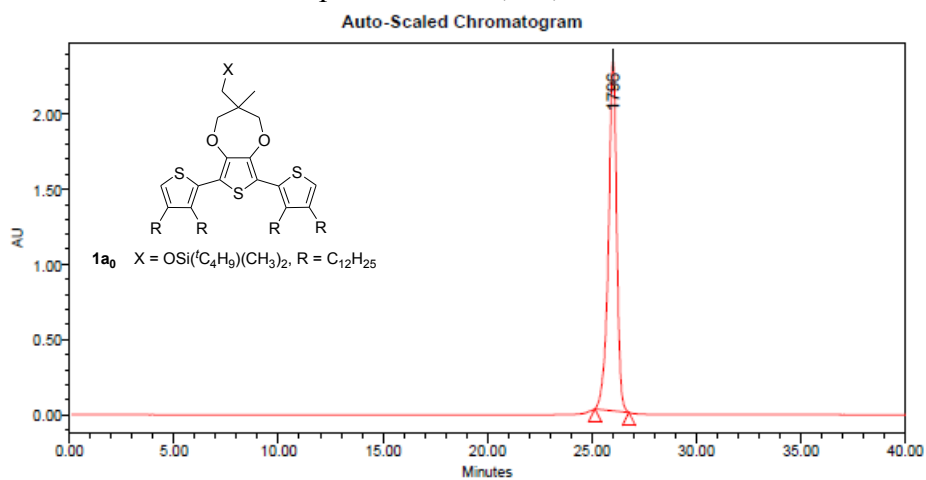

**GPC Results**

|   | Dist Name | Mn   | Mw   | MP   | Mz   | Mz+1 | Mv | Polydispersity | MW Marker 1 | MW Marker 2 |
|---|-----------|------|------|------|------|------|----|----------------|-------------|-------------|
| 1 |           | 1816 | 1839 | 1796 | 1863 | 1888 |    | 1.012570       |             |             |

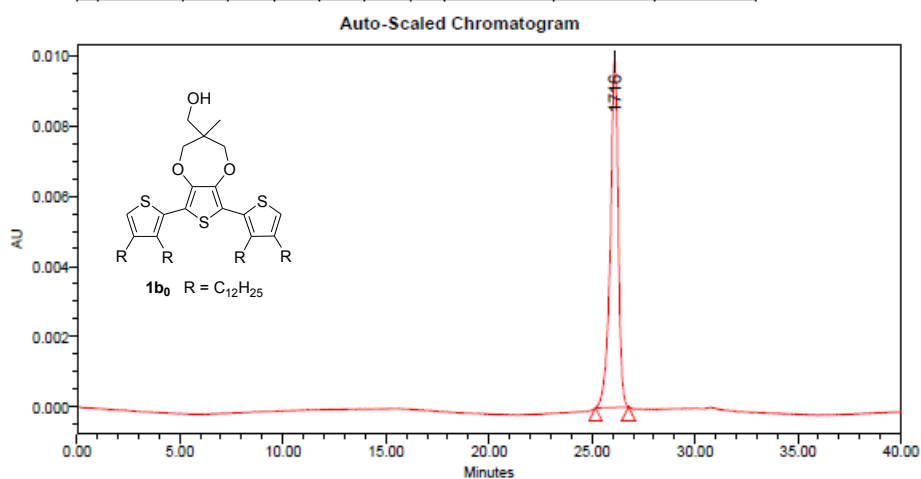

**GPC Results**

|   | Dist Name | Mn   | Mw   | MP   | Mz   | Mz+1 | Mv | Polydispersity | MW Marker 1 | MW Marker 2 |
|---|-----------|------|------|------|------|------|----|----------------|-------------|-------------|
| 1 |           | 1733 | 1756 | 1716 | 1779 | 1804 |    | 1.012802       |             |             |

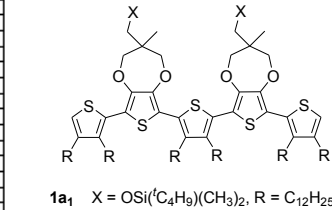

| GPC Results |           |      |      |      |      |      |    |                |             |             |
|-------------|-----------|------|------|------|------|------|----|----------------|-------------|-------------|
|             | Dist Name | Mn   | Mw   | MP   | Mz   | Mz+1 | Mv | Polydispersity | MW Marker 1 | MW Marker 2 |
| 1           |           | 2755 | 2778 | 2717 | 2802 | 2827 |    | 1.008368       |             |             |

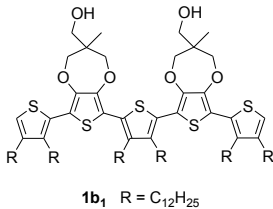

| GPC Results |           |      |      |      |      |      |    |                |             |             |
|-------------|-----------|------|------|------|------|------|----|----------------|-------------|-------------|
|             | Dist Name | Mn   | Mw   | MP   | Mz   | Mz+1 | Mv | Polydispersity | MW Marker 1 | MW Marker 2 |
| 1           |           | 2668 | 2698 | 2629 | 2731 | 2769 |    | 1.011284       |             |             |

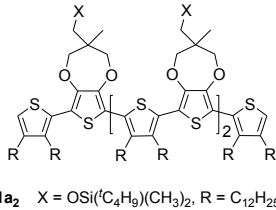

| GPC Results |           |      |      |      |      |      |    |                |             |             |
|-------------|-----------|------|------|------|------|------|----|----------------|-------------|-------------|
|             | Dist Name | Mn   | Mw   | MP   | Mz   | Mz+1 | Mv | Polydispersity | MW Marker 1 | MW Marker 2 |
| 1           |           | 3589 | 3621 | 3587 | 3654 | 3687 |    | 1.008947       |             |             |

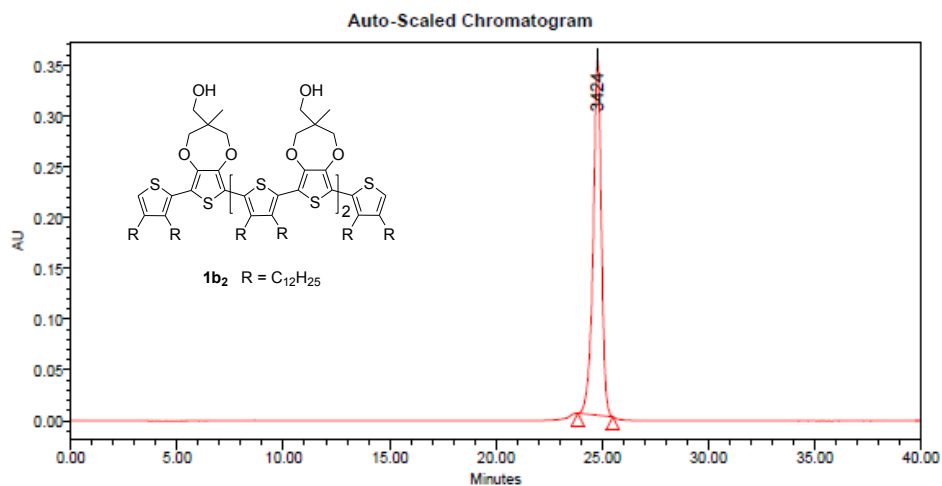

**GPC Results**

|   | Dist Name | Mn   | Mw   | MP   | Mz   | Mz+1 | Mv | Polydispersity | MW Marker 1 | MW Marker 2 |
|---|-----------|------|------|------|------|------|----|----------------|-------------|-------------|
| 1 |           | 3461 | 3495 | 3424 | 3531 | 3568 |    | 1.010083       |             |             |

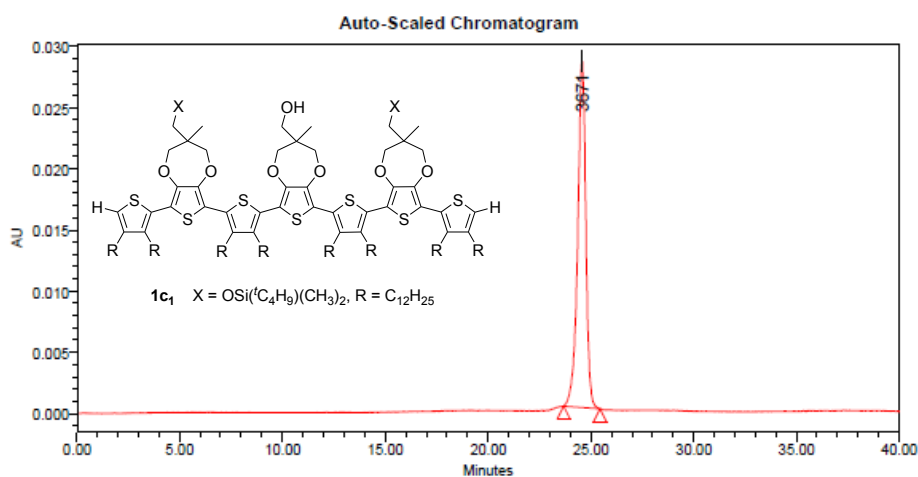

**GPC Results**

|   | Dist Name | Mn   | Mw   | MP   | Mz   | Mz+1 | Mv | Polydispersity | MW Marker 1 | MW Marker 2 |
|---|-----------|------|------|------|------|------|----|----------------|-------------|-------------|
| 1 |           | 3710 | 3743 | 3671 | 3778 | 3815 |    | 1.009086       |             |             |

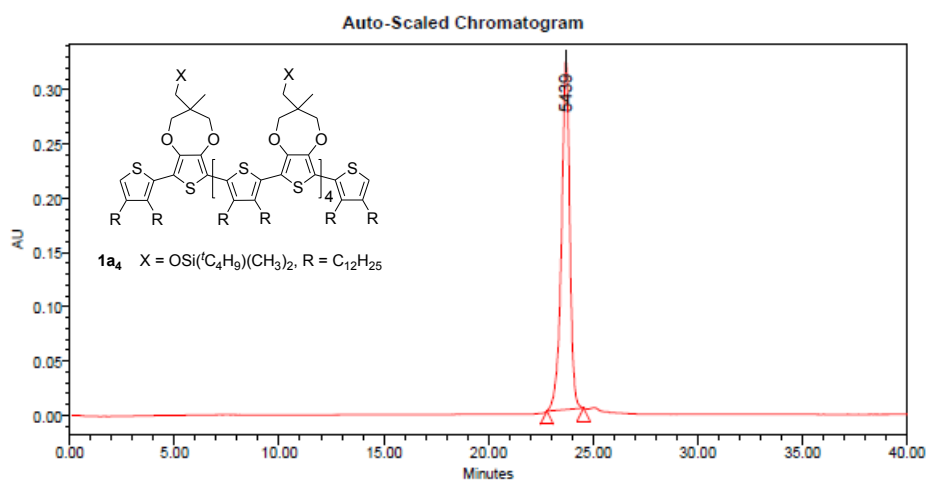

**GPC Results**

|   | Dist Name | Mn   | Mw   | MP   | Mz   | Mz+1 | Mv | Polydispersity | MW Marker 1 | MW Marker 2 |
|---|-----------|------|------|------|------|------|----|----------------|-------------|-------------|
| 1 |           | 5460 | 5505 | 5439 | 5552 | 5600 |    | 1.008245       |             |             |

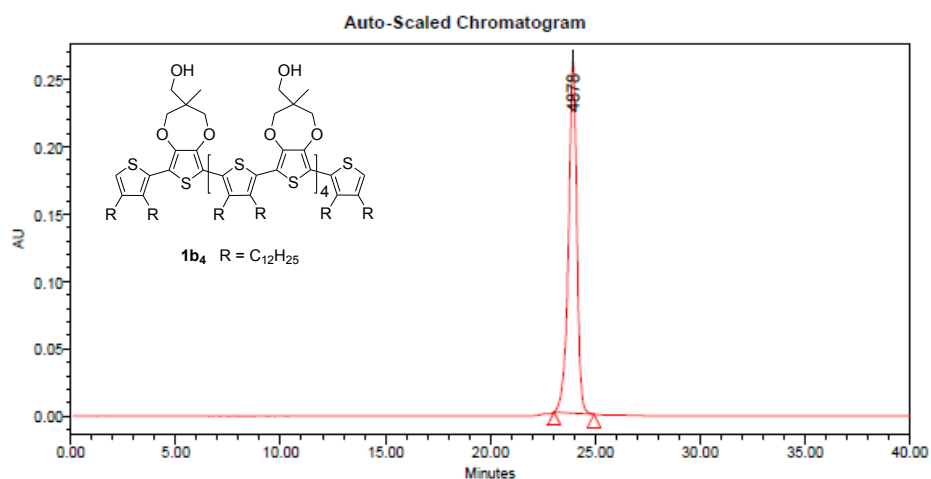

| GPC Results |      |      |      |      |      |    |                |             |  |
|-------------|------|------|------|------|------|----|----------------|-------------|--|
| Dist Name   | Mn   | Mw   | MP   | Mz   | Mz+1 | Mv | Polydispersity | MW Marker 1 |  |
| 1           | 4931 | 4973 | 4878 | 5016 | 5061 |    | 1.008474       | MW Marker 2 |  |

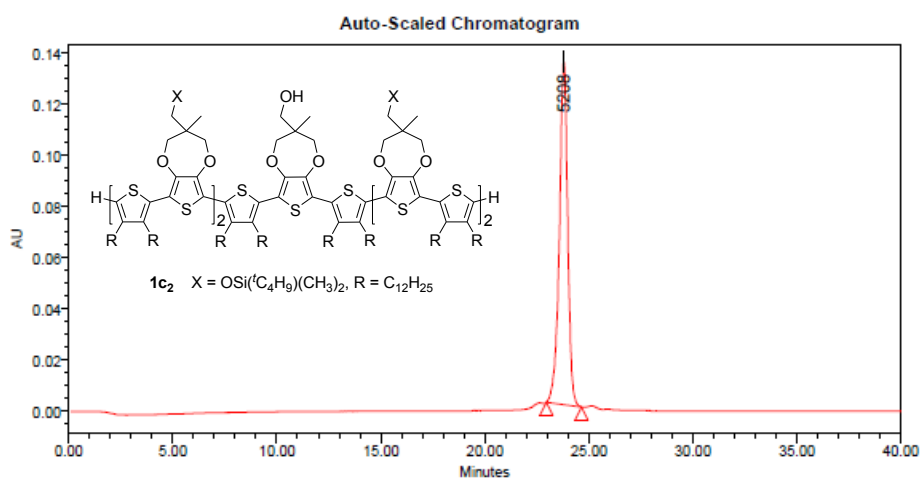

| GPC Results |      |      |      |      |      |    |                |             |             |
|-------------|------|------|------|------|------|----|----------------|-------------|-------------|
| Dist Name   | Mn   | Mw   | MP   | Mz   | Mz+1 | Mv | Polydispersity | MW Marker 1 | MW Marker 2 |
| 1           | 5231 | 5273 | 5208 | 5317 | 5362 |    | 1.008088       |             |             |

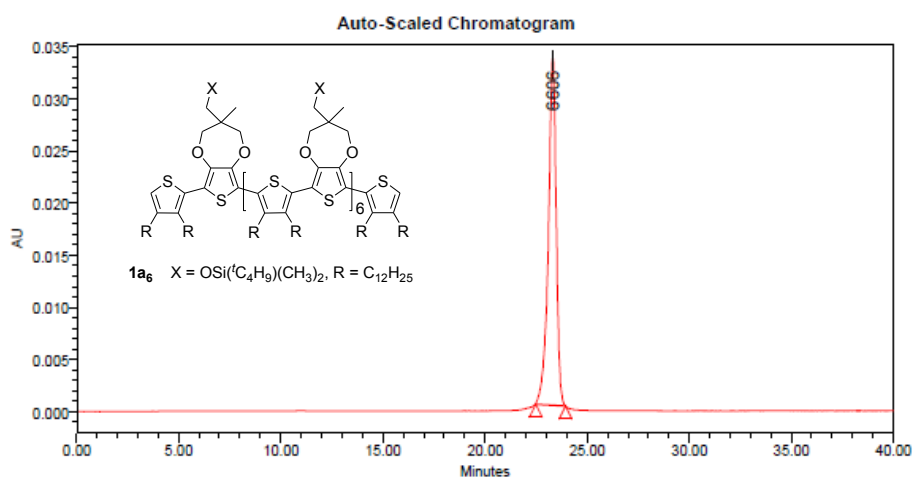

| GPC Results |      |      |      |      |      |    |                |             |             |
|-------------|------|------|------|------|------|----|----------------|-------------|-------------|
| Dist Name   | Mn   | Mw   | MP   | Mz   | Mz+1 | Mv | Polydispersity | MW Marker 1 | MW Marker 2 |
| 1           | 6635 | 6717 | 6606 | 6751 | 6814 |    | 1.012307       |             |             |

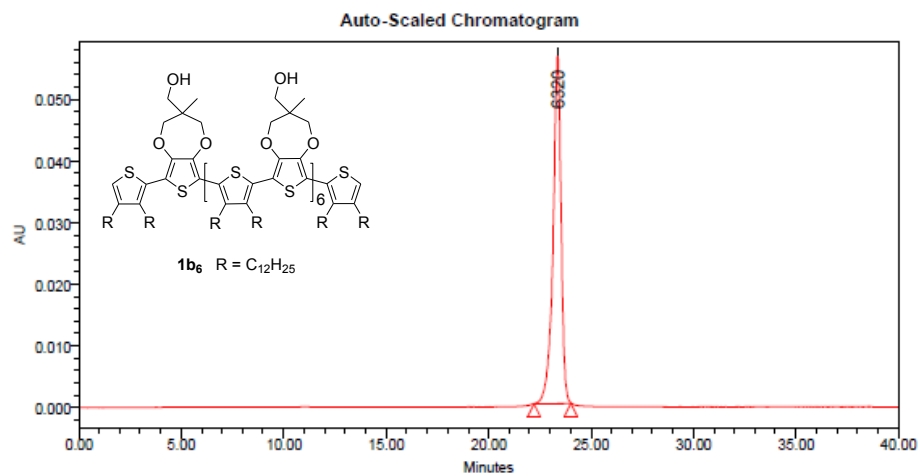

**GPC Results**

| Dist Name | Mn   | Mw   | MP   | Mz   | Mz+1 | Mv | Polydispersity | MW Marker 1 | MW Marker 2 |
|-----------|------|------|------|------|------|----|----------------|-------------|-------------|
| 1         | 6356 | 6411 | 6320 | 6469 | 6529 |    | 1.008687       |             |             |

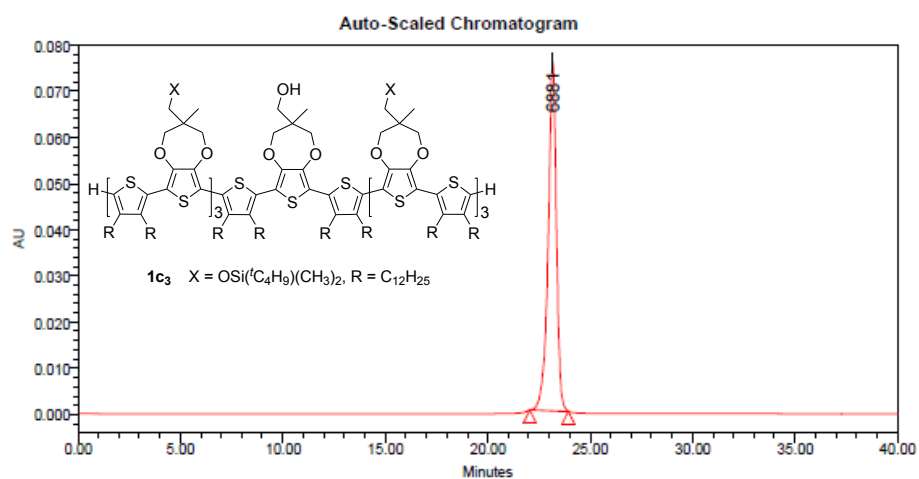

**GPC Results**

| Dist Name | Mn   | Mw   | MP   | Mz   | Mz+1 | Mv | Polydispersity | MW Marker 1 | MW Marker 2 |
|-----------|------|------|------|------|------|----|----------------|-------------|-------------|
| 1         | 6840 | 6911 | 6881 | 6976 | 7042 |    | 1.010348       |             |             |

Plots of  $M_n$  and  $M_c$  against  $M_r$  values for **1-15**.

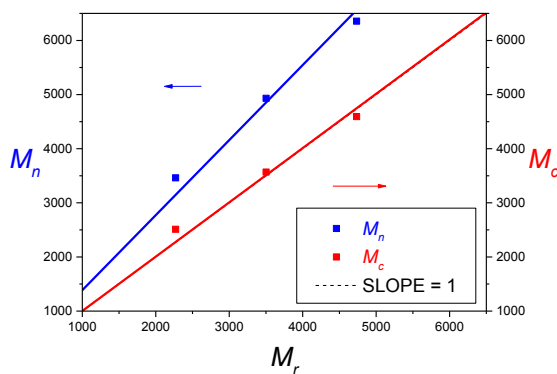

Figure S1.  $M_r$  vs  $M_n$  and  $M_r$  vs  $M_c$  for **1b** (SLOPE ( $M_n$ ) = 1.39,  $R^2$  = 0.99; SLOPE ( $M_c$ ) = 1.00,  $R^2$  = 0.99).

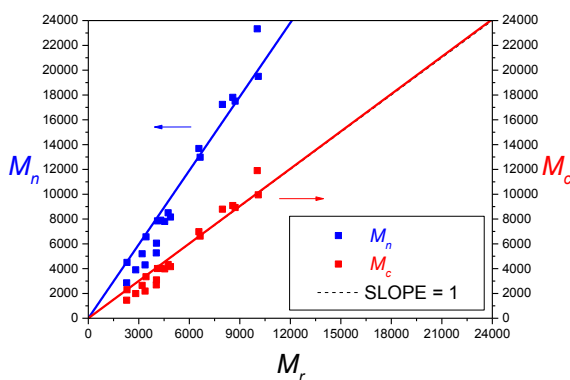

Figure S2.  $M_r$  vs  $M_n$  and  $M_r$  vs  $M_c$  for **2n** (SLOPE ( $M_n$ ) = 1.98,  $R^2$  = 0.94; SLOPE ( $M_c$ ) = 1.00,  $R^2$  = 0.94).

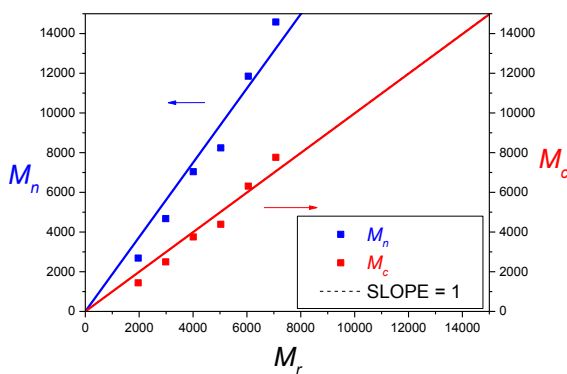

Figure S3.  $M_r$  vs  $M_n$  and  $M_r$  vs  $M_c$  for **3n** (SLOPE ( $M_n$ ) = 1.87,  $R^2$  = 0.96; SLOPE ( $M_c$ ) = 1.00,  $R^2$  = 0.96).

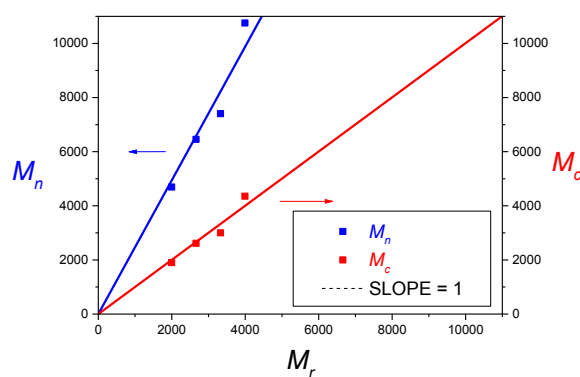

Figure S4.  $M_r$  vs  $M_n$  and  $M_r$  vs  $M_c$  for **4<sub>n</sub>** (SLOPE ( $M_n$ ) = 2.47,  $R^2 = 0.98$ ; SLOPE ( $M_c$ ) = 1.00,  $R^2 = 0.98$ ).

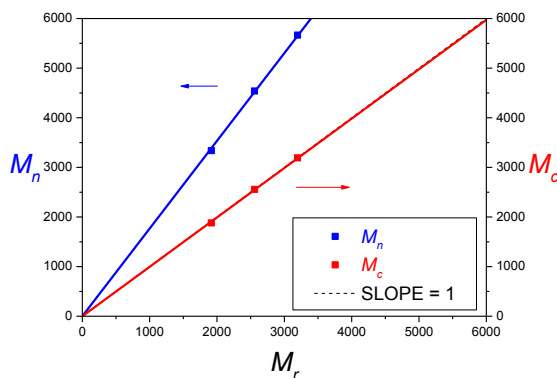

Figure S5.  $M_r$  vs  $M_n$  and  $M_r$  vs  $M_c$  for **5<sub>n</sub>** (SLOPE ( $M_n$ ) = 1.77,  $R^2 = 1.00$ ; SLOPE ( $M_c$ ) = 1.00,  $R^2 = 1.00$ ).

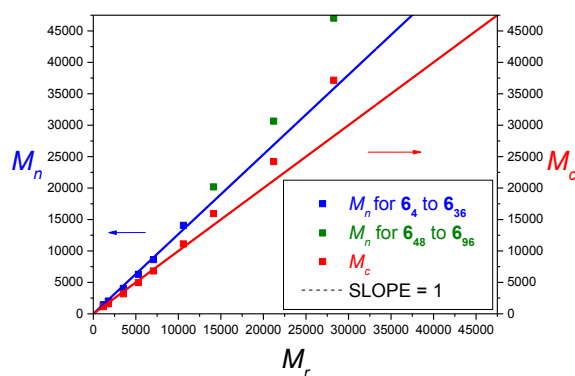

Figure S6a.  $M_r$  vs  $M_n$  and  $M_r$  vs  $M_c$  for **6<sub>4</sub> to 6<sub>36</sub>** (SLOPE ( $M_n$ ) = 1.27,  $R^2 = 0.99$ ; SLOPE ( $M_c$ ) = 1.00,  $R^2 = 0.99$ ).

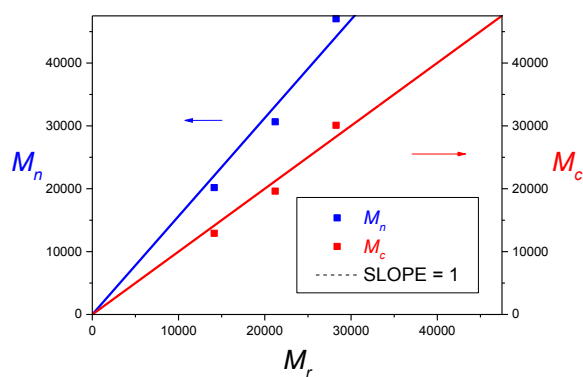

Figure S6b.  $M_r$  vs  $M_n$  and  $M_r$  vs  $M_c$  for **6<sub>48</sub>** to **6<sub>96</sub>** (SLOPE ( $M_n$ ) = 1.56,  $R^2 = 0.95$ ; SLOPE ( $M_c$ ) = 1.00,  $R^2 = 0.95$ ).

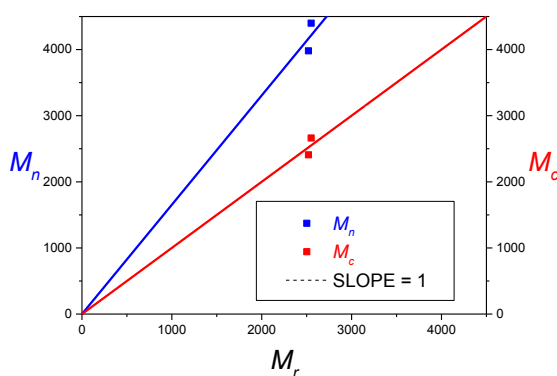

Figure S7.  $M_r$  vs  $M_n$  and  $M_r$  vs  $M_c$  for **7<sub>5</sub>** and **8<sub>6</sub>** (SLOPE ( $M_n$ ) = 1.65,  $R^2 = 0.99$ ; SLOPE ( $M_c$ ) = 1.00,  $R^2 = 0.99$ ).

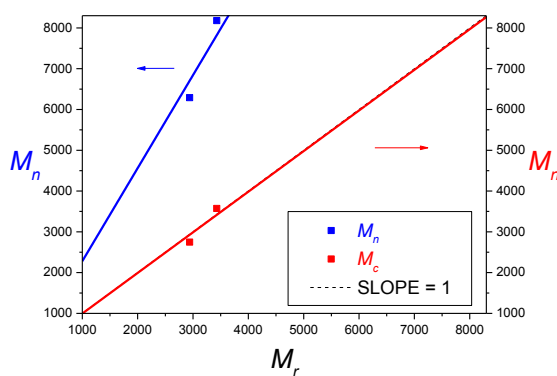

Figure S8.  $M_r$  vs  $M_n$  and  $M_r$  vs  $M_c$  for **9<sub>n</sub>** (SLOPE ( $M_n$ ) = 2.28,  $R^2 = 0.83$ ; SLOPE ( $M_c$ ) = 1.00,  $R^2 = 0.83$ ).



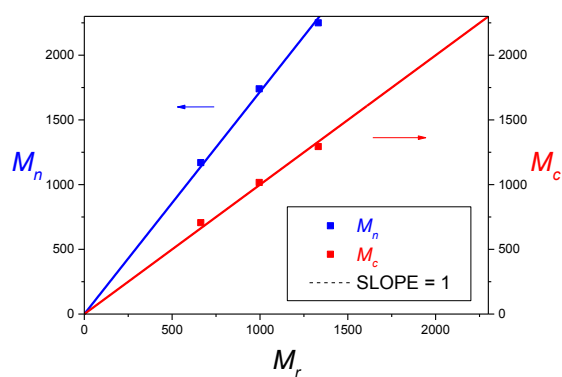

Figure S9.  $M_r$  vs  $M_n$  and  $M_r$  vs  $M_c$  for **11<sub>n</sub>** (SLOPE ( $M_n$ ) = 1.72,  $R^2$  = 0.99; SLOPE ( $M_c$ ) = 1.00,  $R^2$  = 0.99).

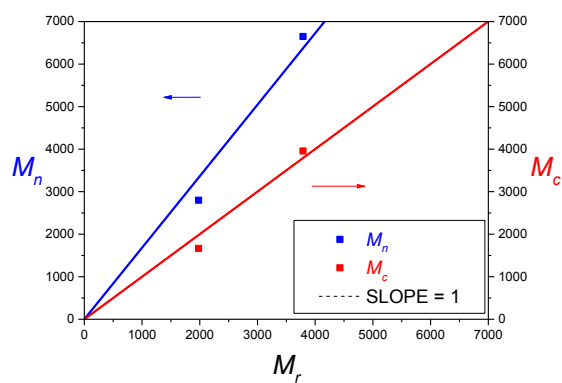

Figure S10.  $M_r$  vs  $M_n$  and  $M_r$  vs  $M_c$  for **13<sub>n</sub>** (SLOPE ( $M_n$ ) = 1.68,  $R^2$  = 0.95; SLOPE ( $M_c$ ) = 1.00,  $R^2$  = 0.95).

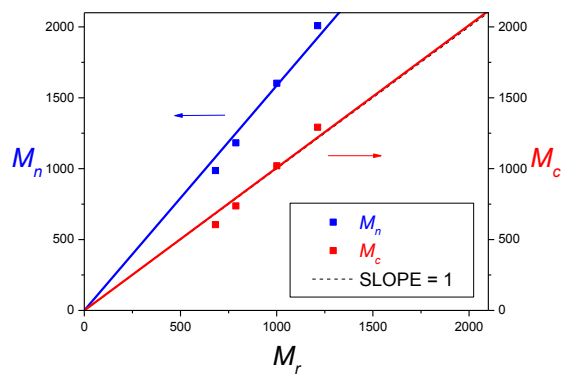

Figure S11.  $M_r$  vs  $M_n$  and  $M_r$  vs  $M_c$  for **14<sub>n</sub>** (SLOPE ( $M_n$ ) = 1.59,  $R^2$  = 0.97; SLOPE ( $M_c$ ) = 1.00,  $R^2$  = 0.97).

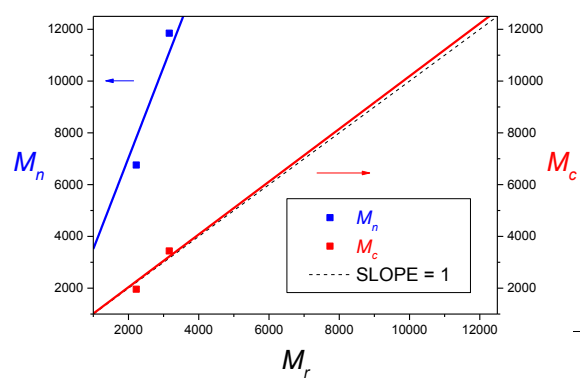

Figure S12.  $M_r$  vs  $M_n$  and  $M_r$  vs  $M_c$  for **15<sub>n</sub>** (SLOPE ( $M_n$ ) = 3.51,  $R^2 = 0.87$ ; SLOPE ( $M_c$ ) = 1.01,  $R^2 = 0.87$ ).
